# Inferring the Demographic History of Inbred Species From Genome-Wide SNP Frequency Data

Paul D. Blischak,<sup>1,2,\*</sup> Michael S. Barker,<sup>1</sup> and Ryan N. Gutenkunst<sup>2</sup>

<sup>1</sup>Department of Ecology & Evolutionary Biology and <sup>2</sup>Department of Molecular & Cellular Biology, University of Arizona, Tucson, AZ, 85721, USA.

\*Corresponding author: E-mail: [pblischak@email.arizona.edu](mailto:pblischak@email.arizona.edu).

Running head: Demography of Inbred Species

## 1 Abstract

2 Demographic inference using the site frequency spectrum (SFS) is a common way to understand  
3 historical events affecting genetic variation. However, most methods for estimating demography  
4 from the SFS assume random mating within populations, precluding these types of analyses in  
5 bred populations. To address this issue, we developed a model for the expected SFS that includes  
6 inbreeding by parameterizing individual genotypes using beta-binomial distributions. We then  
7 take the convolution of these genotype probabilities to calculate the expected frequency of bial-  
8 lelic variants in the population. Using simulations, we evaluated the model's ability to co-estimate  
9 demography and inbreeding using one- and two-population models across a range of inbreeding  
10 levels. We also applied our method to two empirical examples, American pumas (*Puma concolor*)  
11 and domesticated cabbage (*Brassica oleracea* var. *capitata*), inferring models both with and with-  
12 out inbreeding to compare parameter estimates and model fit. Our simulations showed that we  
13 are able to accurately co-estimate demographic parameters and inbreeding even for highly inbred  
14 populations ( $F = 0.9$ ). In contrast, failing to include inbreeding generally resulted in inaccurate  
15 parameter estimates in simulated data and led to poor model fit in our empirical analyses. These  
16 results show that inbreeding can have a strong effect on demographic inference, a pattern that was  
17 especially noticeable for parameters involving changes in population size. Given the importance  
18 of these estimates for informing practices in conservation, agriculture, and elsewhere, our method  
19 provides an important advancement for accurately estimating the demographic histories of these  
20 species.

21 Key words: Conservation, Demography, Domestication, Inbreeding, Site Frequency Spectrum.

## 22 Introduction

23 Estimating the demographic history of closely related populations or species is an important first  
24 step in understanding the interplay of the evolutionary forces shaping genetic variation. Diver-  
25 gence, migration, changes in population size, and other historical events all contribute to pop-  
26 ulation allele frequency dynamics over time, a process that can be modeled using a variety of  
27 approaches. Connecting the expectations from these models with observed genomic data is of-  
28 ten achieved using the site frequency spectrum (SFS), a genome-wide summary of genetic poly-  
29 morphism within and between populations (Sawyer and Hartl 1992; Adams and Hudson 2004;  
30 Caicedo *et al.* 2007; Gutenkunst *et al.* 2009; Nielsen *et al.* 2009). The ease and affordability of col-  
31 lecting genomic SNP data make inferences of demography using the SFS especially appealing,  
32 highlighting their importance in gaining insights into the historical factors affecting neutral varia-  
33 tion in populations. Several recent analyses have also applied SFS-based methods to infer the fit-  
34 ness effects of mutations (Kim *et al.* 2017; Tataru *et al.* 2017; Fortier *et al.* 2019), allowing researchers  
35 to model patterns of selection while simultaneously controlling for demography (Williamson *et al.*  
36 2005).

37 Generating the SFS from a demographic model is a well-studied problem with several possi-  
38 ble approaches, all based on different underlying methodologies, currently implemented [e.g., dif-  
39 fusion: Gutenkunst *et al.* (2009); spectral methods: Lukić and Hey (2012); the coalescent: Excoffier  
40 *et al.* (2013); and moment closure: Jouganous *et al.* (2017)]. However, these methods generally as-  
41 sume panmixia or random mating within populations, which may not be a realistic assumption  
42 for many groups of organisms that are inbred. The reason for this assumption is that the approxi-  
43 mations used by these approaches are all built on top of the Wright-Fisher model and rely on the  
44 simplicity of its binomial sampling scheme for deriving expectations. The excess of homozygos-  
45 ity caused by inbreeding deviates from binomial expectations, leading to changes in the observed  
46 SFS that cannot be captured by models assuming random mating that may affect estimates of  
47 demography. Generalizations of the standard Wright-Fisher model have been made to include  
48 inbreeding through partial self-fertilization (Wright 1951). Nevertheless, these modifications have  
49 yet to be implemented in SFS-based methods for demographic inference.

50 Despite this lack of available SFS-based methods, previous approaches to infer demography  
51 from inbred samples have successfully used alternative representations of genomic data to capture  
52 the extent to which samples share blocks of their genome through non-random mating. This  
53 typically entails identifying parts of the genome that are identical by descent (IBD), or that contain  
54 runs of homozygosity (ROH), and using the length and distribution of these blocks to infer levels  
55 of inbreeding and past population size dynamics (Kirin *et al.* 2010; Kardos *et al.* 2017; Browning  
56 *et al.* 2018). Large IBD blocks are usually an indication of recent inbreeding, while the frequency  
57 and distribution of smaller IBD blocks, which are shared due to common ancestry rather than  
58 inbreeding, contain information about more long-term trends in population size (Kirin *et al.* 2010;  
59 Ceballos *et al.* 2018). However, these methods are generally only used to model size changes in  
60 single populations, which doesn't allow them to estimate other important demographic events  
61 such as population divergence or rates of gene flow. Furthermore, the reliance of these methods  
62 on fully sequenced genomes prevents them from being used in systems that lack such resources.

63 The ability to estimate demography in organisms that do not have a reference genome is a  
64 strength of SFS-based methods. This flexibility allows researchers using reduced representation  
65 methods (e.g., restriction enzyme-based approaches) to collect genomic data for demographic in-

66 ference. A large motivating factor for the work that we have conducted here is to understand  
67 demography in domesticated crop species, which are often highly inbred due to how they are  
68 bred and propagated (Gaut *et al.* 2018). Inbreeding is also of great concern in threatened and en-  
69 dangered species (Shafer *et al.* 2015; Xue *et al.* 2015; Robinson *et al.* 2016, 2019). For many of the  
70 most economically or ecologically important species in these categories, full genome sequences  
71 are typically available and can be used to guide estimates of genetic variation and past popula-  
72 tion dynamics that will help to inform breeding practices or management strategies, respectively.  
73 However, for less well-studied agricultural or threatened species, it is crucial to have tools avail-  
74 able that can also provide this essential information without necessarily needing to obtain a fully  
75 sequenced genome.

76 In this paper we introduce a new method for including inbreeding in estimates of demogra-  
77 phy by modifying the sampling distribution used to generate the expected SFS for a given demo-  
78 graphic model. We have implemented the approach in the Python package *∂a∂i* (Gutenkunst *et al.*  
79 2009), building on top of its existing machinery for estimating demography using the diffusion  
80 approximation. To assess our ability to co-estimate inbreeding and demography, we generated  
81 frequency spectra in both *∂a∂i* and SLiM (Haller and Messer 2019) and used the new model to  
82 make inferences from these simulated data. We also used simulated frequency spectra from *∂a∂i*  
83 to see how inbreeding affects estimates of demography when it is ignored. Finally, we used ge-  
84 nomic data from two empirical examples, American pumas (*Puma concolor*) and domesticated  
85 cabbage (*Brassica oleracea* var. *capitata*), and evaluated estimates of their demographic histories  
86 both with and without inbreeding. In general, our model is shown to be accurate even for highly  
87 inbred populations ( $F = 0.9$ ). We also found that failing to account for inbreeding leads to inac-  
88 curate estimates of parameters and poor model fit. Taken together, the model we have developed  
89 provides a powerful tool to jointly estimate inbreeding and demography, and will help to facilitate  
90 evolutionary inferences in a wide-range of species.

## 91 **New Approaches**

92 We start with a brief overview of the SFS and describe its derivation from the population distri-  
93 bution of allele frequencies (DAF), which can be obtained using the diffusion approximation as  
94 described previously (Gutenkunst *et al.* 2009). We then propose a probability model for calcu-  
95 lating the number of derived mutations in an inbred population and provide an expression for  
96 the expected SFS incorporating this distribution. Using this expression for the expected SFS with  
97 inbreeding we can perform parameter inference with a composite likelihood assuming a Poisson  
98 Random Field model (Sawyer and Hartl 1992).

### 99 *The Site Frequency Spectrum*

100 The site frequency spectrum (SFS) is a multidimensional summary of genetic variation within  
101 and across populations that records how often derived biallelic variants of different frequencies  
102 are observed in a sample of individuals. For example, given a sample of 20 chromosomes (10  
103 diploid individuals) from three populations, the SFS entry at index [3,8,17] records how often we  
104 observe a variant in three, eight, and 17 out of the 20 chromosomes in populations one, two, and  
105 three, respectively. In general, for  $P$  populations with sample sizes  $n_1, n_2, \dots, n_P$ , we index the  
106 SFS using  $[d_1, d_2, \dots, d_P]$  to record how often we observe a variant with frequency  $d_1, d_2, \dots, d_P$  in  
107 populations one through  $P$ .

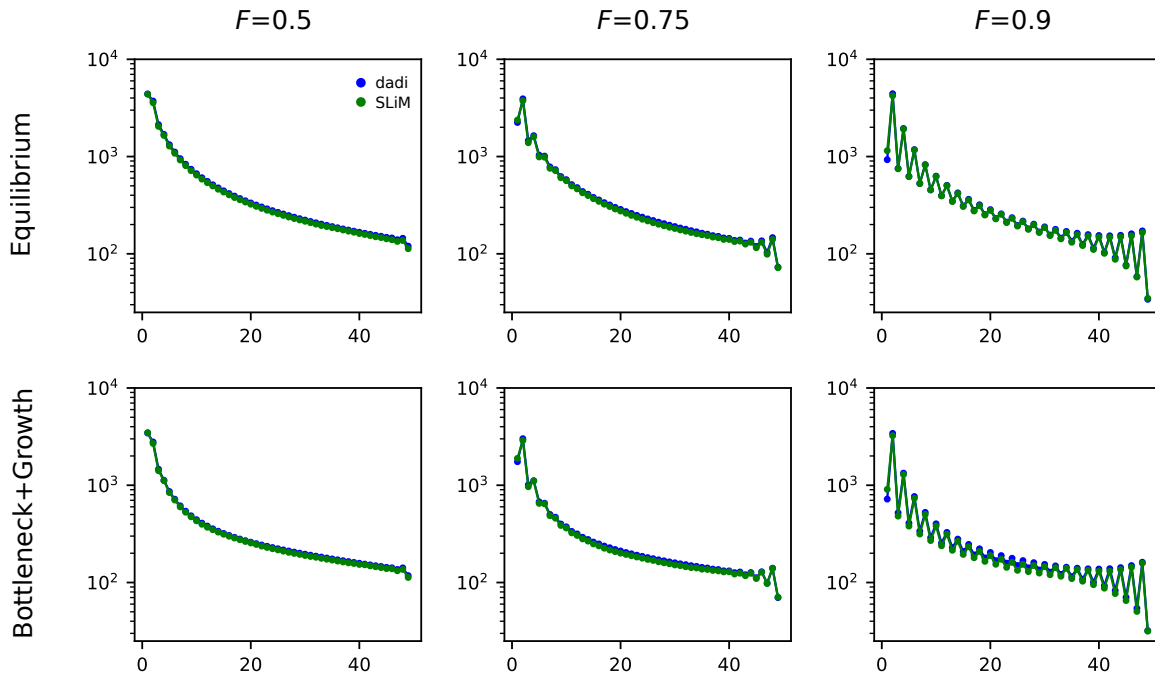

Figure 1: Comparison of expected spectra for  $F = 0.5, 0.75,$  and  $0.9$  between  $\partial\text{adi}$  (blue) and SLiM (green) for the equilibrium and bottleneck+growth models.

108 The observed SFS can be obtained from empirical data by tabulating derived SNP frequen-  
 109 cies across sampled populations to generate the  $P$ -dimensional array described above. When a  
 110 derived allele cannot be determined, we can instead record the frequency of the minor allele, ef-  
 111 fectively “folding” the spectrum in half by only considering the variants with frequency less than  
 112 0.5. Demographic inference can then be conducted by comparing the observed SFS with the SFS  
 113 obtained from a demographic model (Sawyer and Hartl 1992).

114 Given the  $P$ -dimensional distribution of allele frequencies obtained from a given demographic  
 115 model,  $\phi$ , the expected SFS can be obtained by calculating the probability of drawing  $d_1, \dots, d_P$   
 116 derived alleles while integrating across the distribution of allele frequencies in the populations.  
 117 Within each population, the number of derived alleles has a binomial distribution under pan-  
 118 mixia. We then integrate across all possible allele frequencies, weighting the binomial probability  
 119 of drawing  $d_i$  derived alleles by the density determined by  $\phi$  within population  $i$ . Taking this  $P$ -  
 120 dimensional integral across the weighted product of binomial probabilities gives us the expression  
 121 for the joint expected SFS:

$$\mathbb{E}[d_1, \dots, d_P] = \int_0^1 \cdots \int_0^1 \prod_{i=1, \dots, P} \binom{n_i}{d_i} x_i^{d_i} (1 - x_i)^{n_i - d_i} \phi(x_1, \dots, x_P) dx_i. \quad (1)$$

### 122 *The Expected SFS with Inbreeding*

123 Through its use of binomial sampling, the preceding derivation for the expected SFS makes the  
 124 assumption that matings within populations are random. When inbreeding has occurred, individ-

125 ual genotypes are more likely to be homozygous due to being IBD. One way to capture this excess  
 126 in homozygosity is to incorporate the inbreeding coefficient  $F$  into a generalized form for the ex-  
 127 pected genotype frequencies under Hardy Weinberg equilibrium (Wright 1951). Here we use an  
 128 alternative model that captures the fact that genotypes within populations will be correlated due  
 129 to inbreeding, pushing the distribution of genotypes towards homozygotes. To capture this cor-  
 130 relation among genotypes, Balding and Nichols (1995, 1997) proposed a probability model to in-  
 131 corporate inbreeding using a beta-binomial distribution. Under this model, individual genotypes  
 132 are a random variable,  $G_i \in \{0, 1, 2\}$ , for the number of copies of the derived allele in individual  
 133  $i$  ( $i = 1, \dots, n$ ) such that  $Pr(G_i = g)$  at an individual locus with allele frequency  $p \in (0, 1)$  and  
 134 population inbreeding coefficient  $F \in (0, 1)$  is beta-binomial with the following form:

$$\begin{aligned} Pr(G_i = g|p, F) &= \mathcal{BB} \left( g, \alpha = p \left[ \frac{1-F}{F} \right], \beta = (1-p) \left[ \frac{1-F}{F} \right] \right) \\ &= \binom{2}{g} \frac{B(g + \alpha, 2 - g + \beta)}{B(\alpha, \beta)}. \end{aligned} \quad (2)$$

135 Here  $\mathcal{BB}$  denotes the probability mass function for the beta-binomial distribution and  $B(x, y)$  is  
 136 the beta function with dummy parameters  $x$  and  $y$ . The parameterization of  $\alpha = p \left[ \frac{1-F}{F} \right]$  and  
 137  $\beta = (1-p) \left[ \frac{1-F}{F} \right]$  introduces the overdispersion of probability towards homozygous genotypes  
 138 that is expected as inbreeding increases (Balding and Nichols 1995, 1997).

139 To get the expected SFS, we need to be able to model the total number of derived alleles  
 140 sampled in the population, which is the sum across the genotypes of all individuals. Given a  
 141 sample of  $n$  diploid individuals ( $2n$  chromosomes), we use the random variable  $D \in \{0, \dots, 2n\}$  to  
 142 denote this quantity. The probability mass function for  $D$  is an  $n$ -fold convolution of beta-binomial  
 143 distributions, which does not have a simple distributional form. However, we can obtain the  
 144 probability mass function by considering all possible combinations of the probability of drawing  
 145  $D = d$  alleles across  $n$  beta-binomial distributions, giving us a closed form expression for the  
 146 convolution of  $n$  beta-binomial random variables:

$$\begin{aligned} P(D = d|p, F) &= \mathcal{BB}_n^* \left( d, \alpha = p \left[ \frac{1-F}{F} \right], \beta = (1-p) \left[ \frac{1-F}{F} \right] \right) \\ &= \sum_{R \in p_n(d)} \frac{n!}{n_0! n_1! n_2!} \left[ \prod_{r \in R} \mathcal{BB}(r, \alpha, \beta) \right]. \end{aligned} \quad (3)$$

147 Breaking this down, we can think of it as enumerating all possible ways to generate genotypes  
 148 in  $n$  individuals such that they sum to  $d$ , times the beta-binomial probability of sampling each  
 149 genotype. More specifically, let  $p_n(d)$  be an array of integer partitions with  $n$  entries that sum  
 150 to  $d$  such that all entries in the partition are 0, 1, or 2 (corresponding to the possible genotype  
 151 values). For example, the partitions defined by  $p_5(4)$  are  $[2, 2, 0, 0, 0]$ ,  $[2, 1, 1, 0, 0]$ , and  $[1, 1, 1, 1, 0]$ .  
 152 Then for each of these partitions, we use the multinomial coefficient  $\frac{n!}{n_0! n_1! n_2!}$ , with  $n_0$ ,  $n_1$ , and  $n_2$   
 153 corresponding to the number of partition entries equal to 0, 1, and 2, respectively, to account for all  
 154 possible rearrangements of the partition entries. Next, we multiply the beta-binomial probability

155 for each genotype in a partition using Eq. 2. Taking the product across all possible partitions gives  
156 us the full expression for the  $n$ -fold convolution, which we denote  $\mathcal{BB}_n^*$  (\* is the mathematical  
157 operator for convolutions). Inserting this distribution into Eq. 1 gives us the final form for the  
158 expected SFS with inbreeding:

$$\mathbb{E}_F[d_1, \dots, d_p] = \int_0^1 \cdots \int_0^1 \prod_{i=1, \dots, p} \mathcal{BB}_{n_i}^* \left( d_i, x_i \left[ \frac{1 - F_i}{F_i} \right], (1 - x_i) \left[ \frac{1 - F_i}{F_i} \right] \right) \phi(x_1, \dots, x_p) dx_i. \quad (4)$$

159 We have written a small R Shiny application illustrating the probability distribution for the  
160 beta-binomial convolution (available on GitHub). Figure 1 also shows a sample of example fre-  
161 quency spectra for different levels of inbreeding.

## 162 Results

### 163 *Comparison with SLiM*

164 We used SLiM (Haller and Messer 2019) to validate the expectations of the SFS with inbreeding  
165 by simulating frequency spectra under three models (described in more detail in the **Simulations**  
166 section below): a simple equilibrium model (standard neutral model), a one-population bottleneck  
167 and growth model, and a two-population divergence and one-way migration model. Inbreeding  
168 was assumed to occur through selfing and expected frequency spectra were obtained by taking the  
169 mean of 5000 simulations for each model. Figure 1 plots the comparison between the SFS obtained  
170 from  $\partial a \partial i$  (blue) and SLiM (green) for the equilibrium and bottleneck models with  $F=0.5, 0.75,$   
171 and  $0.9$ , respectively. The frequency spectra for these models for  $F=0.1$  and  $F=0.25$  are presented  
172 in Figure S1 and the comparisons for the two-population divergence model are in Figure S2. The  
173 percent differences between the frequency spectra from  $\partial a \partial i$  and SLiM were between 0.1% to 0.2%  
174 for the one-population models and were between 0.02% to 0.03% for the two-population model,  
175 demonstrating that our results from modeling the expected SFS with beta-binomial distributions  
176 corresponds well with the spectra simulated from SLiM.

177 We also used simulated frequency spectra from SLiM to estimate parameters for these three  
178 models in  $\partial a \partial i$ . Figure 2 shows the distribution of estimated inbreeding coefficients for the bottle-  
179 neck and growth model (RMSD = 0.094) and divergence and one-way migration models (RMSD  
180 = 0.163). Similar plots for all other estimated parameters across all three models are presented in  
181 Figures S3–S5.

### 182 *Simulations*

#### 183 *Simulation 1: Co-Estimating Inbreeding and Demography*

184 To assess our ability to estimate demographic parameters under increasing levels of inbreeding  
185 ( $F= 0.1, 0.25, 0.5, 0.75,$  and  $0.9$ ), as well as the inbreeding coefficient within a population itself,  
186 we performed demographic inference using simulated frequency spectra under three models:  
187 (1) a standard neutral model, (2) a one-population bottleneck and growth model, and (3) a two-  
188 population divergence model with unidirectional gene flow (models two and three are illustrated  
189 in Figure 2). For the standard neutral model, the inbreeding coefficient is the only parameter that

190 needs to be estimated. The one-population bottleneck and growth model has three parameters:  
191 the inbreeding coefficient, the relative size of the bottlenecked population ( $\nu_0 = 0.1, 0.25, \text{ and } 0.5$ ),  
192 and the recovery time back to the original size ( $T = 0.1, 0.2, \text{ and } 0.3$ ). The two-population model  
193 has four parameters: the inbreeding coefficient, the relative size of the diverging population ( $\nu_2 =$   
194  $0.1, 0.25, 0.5$ ), the time of divergence from the main population ( $T = 0.1, 0.2, \text{ and } 0.3$ ), and the rate  
195 of gene flow from the main population into the diverged population ( $M_{21} = 0.5, 1.0, \text{ and } 1.5$ ). All  
196 parameters are specified relative to the ancestral population size, which in *∂a∂i* defaults to 1.0.

197 Figures S6–S8 shows the distribution of estimated inbreeding coefficients across 20 replicate  
198 experiments for every combination of simulation parameters for the equilibrium, bottleneck, and  
199 divergence models. For all three models, we are able to recover accurate estimates of  $F$  (Model  
200 1 RMSD: 0.0139; Model 2 RMSD: 0.0176; Model 3 RMSD: 0.0406) even when inbreeding is quite  
201 high ( $F = 0.9$ ). Figure S7 also shows plots for estimates of bottleneck size and recovery time  
202 across inbreeding levels for model two. The RMSD for these estimates across all simulated values  
203 were 0.0236 and 0.0184 for  $\nu_0$  and  $T$ , respectively. Figure S8 shows similar plots for estimates of  
204 population size, divergence time, and one-way migration rate across inbreeding levels for model  
205 three. The RMSD for these estimates across all simulated values were 0.0131 for  $\nu_2$ , 0.0103 for  $T$ ,  
206 and 0.158 for  $M_{21}$ .

#### 207 *Simulation 2: Parameter Estimation When Inbreeding is Ignored*

208 To understand the impact of ignoring inbreeding on demographic inference, we simulated data  
209 sets with inbreeding under the same bottleneck and divergence models as above (models two  
210 and three) but performed inference under the assumption that inbreeding was absent. Because of  
211 initial issues with convergence in these analyses, particularly with the bottleneck model, and the  
212 fact that higher levels of inbreeding cause increasingly conspicuous changes to the SFS (e.g., see  
213 Figure 1), we used a smaller range for  $F$  in these simulations: 0.1, 0.2, 0.3, 0.4, and 0.5.

214 Parameter estimates for the bottleneck model had higher rates of error compared to when  
215 inbreeding was directly modeled. The RMSDs for  $\nu_0$  and  $T$  were 0.191 and 0.117, respectively.  
216 Estimates of these parameters also got worse as inbreeding increased (Figure S9), clearly demon-  
217 strating the issues that can arise when inbreeding is ignored. In contrast, results for the divergence  
218 model were surprising in that they didn't show the high levels of estimation error seen with the  
219 bottleneck model (Figure S10). The RMSD values for the parameters of the divergence model were  
220 0.0261 for  $\nu_2$ , 0.0130 for  $T$ , and 0.142 for  $M_{21}$ . Interestingly, the RMSD for  $M_{21}$  was actually lower  
221 in this simulation experiment than when inbreeding was modeled (0.158). However, the increase  
222 in RMSD for the simulations where inbreeding is modeled is due to using higher levels of in-  
223 breeding ( $F > 0.5$ ). If we restrict the calculation of RMSD in the estimates including inbreeding to  
224 only those with  $F \leq 0.5$ , the RMSD is lower than when inbreeding is ignored, as expected (0.109).  
225 RMSD values for  $\nu_2$  and  $T$  were higher for model two than in *Simulation 1*, indicating that these  
226 parameters may be more sensitive to the effects of unmodeled inbreeding.

#### 227 *Simulation 3: Masking Rare Variants*

228 Several techniques to 'side-step' the impact of inbreeding have been taken in empirical analy-  
229 ses. This includes sampling only a single chromosome per site, per individual (e.g., Beissinger  
230 *et al.* 2016; Koenig *et al.* 2019) or masking rare variants (e.g., Cornejo *et al.* 2018), which are dis-  
231 proportionately affected at lower levels of inbreeding (Figure 1). Since sampling only a single  
232 chromosome cuts the sample size in half, and investigations on the effect of sample size on de-

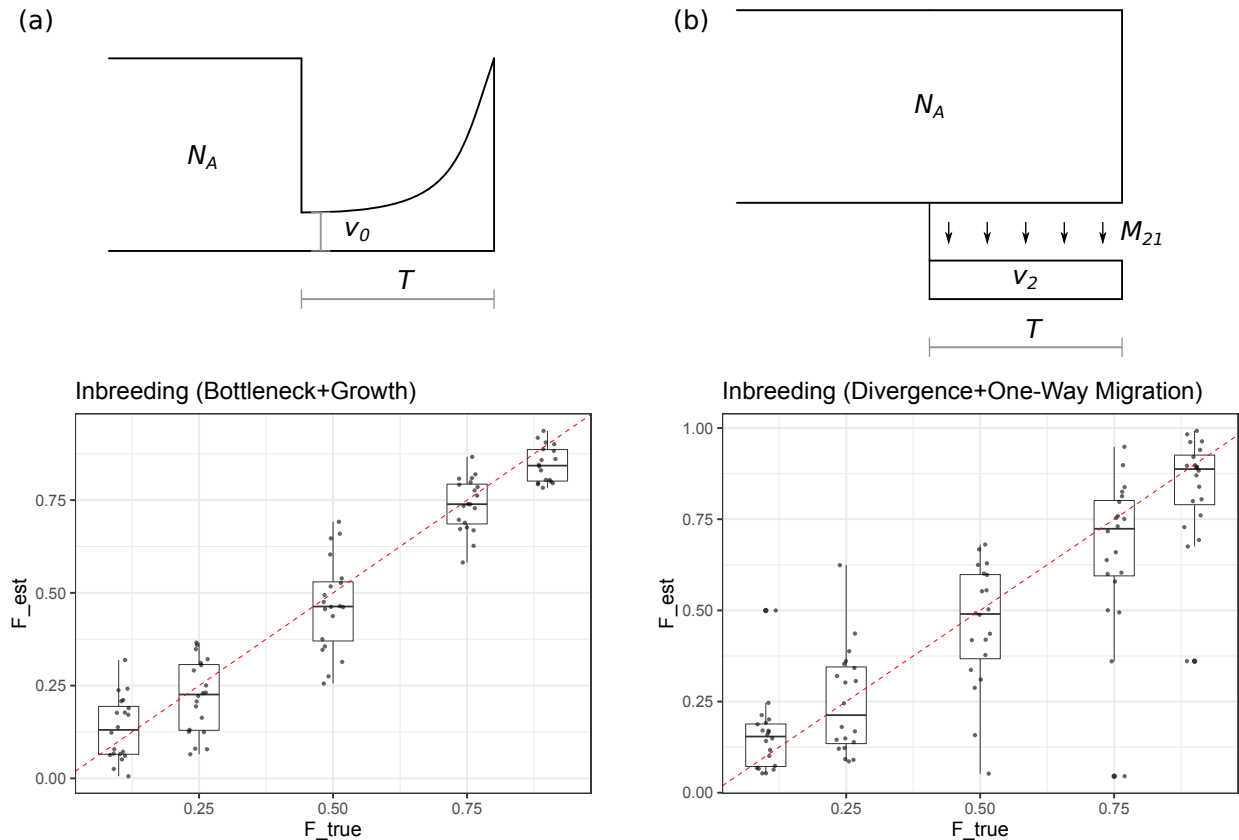

Figure 2: (a) Estimates of  $F$  from data generated with SLiM for the bottleneck and growth model (lower) plus an illustration of the model (upper). In this model,  $N_A$  is the ancestral population size,  $v_0$  is the size of the bottleneck (proportion of  $N_A$  remaining after population reduction), and  $T$  is the amount of time for the population to recover back to a size of  $N_A$ . (b) Estimates of  $F$  from data generated with SLiM for the divergence with one-way migration model (lower) plus an illustration of the model (upper).  $N_A$  in this model is the same as the bottleneck model,  $v_2$  is the size of the diverging population (again a proportion of  $N_A$ ),  $T$  is the divergence time between populations, and  $M_{21}$  is the one-way migration rate of individuals from population one into population two.

233 mographic inference have already been explored (Robinson *et al.* 2014), we instead focused on the  
 234 effect of masking rare variants under increasing levels of inbreeding. For the bottleneck model  
 235 we masked the singleton and doubleton entries of the 1D-SFS, and for the divergence model we  
 236 masked the bottom corner of the 2D-SFS (ie singletons, doubletons, and their combinations across  
 237 both populations). We then used the same range of parameters as in the previous simulations to  
 238 see how much masking affected our inferences.

239 For the bottleneck and growth model, data masking had a small but noticeable effect on  
 240 parameter estimation. The bottleneck size was estimated with less accuracy compared to when  
 241 inbreeding was included (RMSD = 0.0296) and estimates of recovery time also had higher error  
 242 (RMSD = 0.0218), typically in the direction of underestimation (Figure S11). The effect of mask-  
 243 ing was more pronounced in the divergence model (Figure S12), particularly for the migration  
 244 parameter, where the amount of gene flow was almost always underestimated across all param-



245 eter combinations (RMSD = 0.193). Estimates of population size and divergence time were also  
246 slightly underestimated when compared to models including inbreeding (RMSD = 0.0122 and  
247 0.0103, respectively) but the effect was less pronounced.

#### 248 *Simulation 4: Misspecified Inbreeding*

249 As a final test of the model for inbreeding, we simulated frequency spectra under the bottleneck  
250 and divergence models without inbreeding but included it as a parameter to be estimated. The  
251 expectation in this case is that inbreeding should be estimated close to 0 and that its inclusion in  
252 the model does not lead to poor estimates of other model parameters. However, for both models,  
253 the inbreeding parameter was always estimated to be greater than 0. The mean estimates of  $F$  for  
254 the bottleneck and divergence models were 0.0934 and 0.212, respectively. Nevertheless, despite  
255 not estimating an absence of inbreeding, the other model parameters were estimated with only  
256 slightly higher levels of error (Figures S13 and S14). For the bottleneck model, bottleneck size and  
257 duration had RMSD values of 0.0280 and 0.0268, respectively, which are both higher levels of error  
258 than the simulations where inbreeding was truly present. Parameters in the divergence model had  
259 RMSDs of 0.0183 for  $\nu_2$ , 0.0110 for  $T$ , and 0.132 for  $M_{21}$ , showing that the two-population model  
260 was not strongly affected by the level of inbreeding estimated in population two.

#### 261 *Empirical Examples*

##### 262 *American Puma*

263 The American puma (*Puma concolor*) is an iconic carnivore distributed primarily in western North  
264 America and South America, occupying a large diversity of habitats across its range. However, in  
265 the eastern United States, the only remnant population is the highly endangered Florida panther  
266 (Hansen 1992; Culver *et al.* 2000). Florida panthers have been the subject of large-scale conserva-  
267 tion efforts aimed at ameliorating the adverse effects of small population size, including moving  
268 individuals from their closest sister population, the Texas puma, to introduce novel genetic varia-  
269 tion (Seal and Lacy 1994; Johnson *et al.* 2010). Using genomic data from five individuals of Texas  
270 pumas and two individuals of 'canonical' Florida panthers from Ochoa *et al.* (2019), we estimated  
271 the demographic history of these two populations to investigate their divergence time, changes  
272 in population size, and levels of inbreeding (see cartoon in Figure 3). More specifically, we fit a  
273 model that included an initial change in population size to mimic the colonization of North Amer-  
274 ica by the Texas population ( $N_{TX}$ ), the duration of time spent at the new population size ( $T_1$ ), the  
275 divergence time between Texas pumas and Florida panthers ( $T_2$ ), and the inbreeding coefficients  
276 for both the Texas and Florida populations ( $F_{TX}$  and  $F_{FL}$ ).

277 After processing (see **Methods**), 6,262,417 variant sites were retained for constructing the 2D-  
278 SFS. Because we lacked a suitable outgroup for determining ancestral versus derived allelic states,  
279 we used the folded SFS for all model fits. Table 1 lists parameter estimates and their 95% confi-  
280 dence intervals for models fit with and without inbreeding ( $\epsilon = 10^{-2}$ ) and uncertainty estimates  
281 across different step sizes for numerical differentiation using the Godambe Information Matrix  
282 (Coffman *et al.* 2015) are presented in Tables S3 and S4. In both models, the Texas and Florida  
283 populations are estimated to have diverged 7,000–8,000 years ago, with both also having similar  
284 estimates of the ancestral population size (120,000–130,000 individuals). As expected, the Florida  
285 population experienced a severe reduction in population size down to 1,200–1,600 individuals,  
286 as well as having a high estimate of  $F$  in the model including inbreeding ( $F_{FL} = 0.607$ ). Texas

Table 1: Parameter estimates for *Puma concolor* from demographic models estimated both with and without inbreeding. 95% confidence intervals are given in parentheses and were estimated using a step size of  $\epsilon = 10^{-2}$  for numerical differentiation. Population sizes are given in number of individuals and divergence time is given in years.

| Parameter | Estimate With Inbreeding  | Estimate Without Inbreeding |
|-----------|---------------------------|-----------------------------|
| $N_A$     | 130,000 (129,000–132,000) | 120,000 (92,400–157,000)    |
| $N_{TX}$  | 70,800 (63,300–79,200)    | 23,700 (3,490–161,000)      |
| $N_{FL}$  | 1,600 (128–19,100)        | 1,210 (118–12,500)          |
| $T_1$     | 247,000 (169,000–359,000) | 26,800 (504–1,420,000)      |
| $T_2$     | 7,820 (650–94,200)        | 8,230 (784–86,500)          |
| $F_{TX}$  | 0.440 (0.408–0.474)       | –                           |
| $F_{FL}$  | 0.607 (0.588–0.626)       | –                           |

287 pumas were also inferred to be inbred, though less so than Florida panthers ( $F_{TX} = 0.440$ ). Es-  
 288 timates of population size for the Texas population were different between the models with and  
 289 without inbreeding (70,800 individuals versus 23,700 individuals) and the duration of the initial  
 290 population size change ( $T_1$ ) were especially different as well (247,000 years versus 26,800 years).  
 291 The log-likelihoods for the model with and without inbreeding are  $-318058.079$  and  $-453003.048$ ,  
 292 respectively, and the Godambe-adjusted likelihood ratio statistic is 425.489 (p-value =  $\sim 0.0$ ; Coff-  
 293 man *et al.* 2015), demonstrating that the model with inbreeding has a significantly better fit to the  
 294 data. In addition, when comparing the predicted SFS from the models with the observed SFS  
 295 (Figure 3), the residuals for the model with inbreeding were lower overall, providing even more  
 296 support for preferring the model with inbreeding. Uncertainty estimates were also typically more  
 297 stable across step sizes for the model with inbreeding.

### 298 *Domesticated Cabbage*

299 *Brassica oleracea* is an agronomically important plant species cultivated primarily in Europe, Asia,  
 300 and North America (Maggioni 2015). It is especially well-known for its morphological diver-  
 301 sity, having been domesticated into several different crops including broccoli, Brussels sprouts,  
 302 cauliflower, cabbage, kale, and kohlrabi, among others. The timing and origin of domestication  
 303 for these different *B. oleracea* crops is still uncertain, but several hypotheses have been proposed to  
 304 explain their evolutionary history (Maggioni 2015). Cabbage, *B. oleracea* var. *capitata*, is thought to  
 305 have been domesticated roughly 500 years ago in the Mediterranean region (Cheng *et al.* 2016a,b),  
 306 providing an interesting hypothesis that we can test using demographic models.

307 To infer the demographic history of domesticated cabbage, we used SNP data from publicly  
 308 available resequencing data for 45 individuals from Cheng *et al.* (2016a,b). We then fit a demo-  
 309 graphic model for cabbage domestication that included two changes in population size ( $N_1$  and  
 310  $N_2$ ), the amount of time spent at these population sizes ( $T_1$  and  $T_2$ ), and the level of inbreeding ( $F$ )  
 311 [see cartoon in Figure 4]. We used 2,941,018 intergenic SNPs to build the folded SFS for *B. oleracea*  
 312 var. *capitata* and fit models with and without inbreeding. Parameter estimates were obtained us-

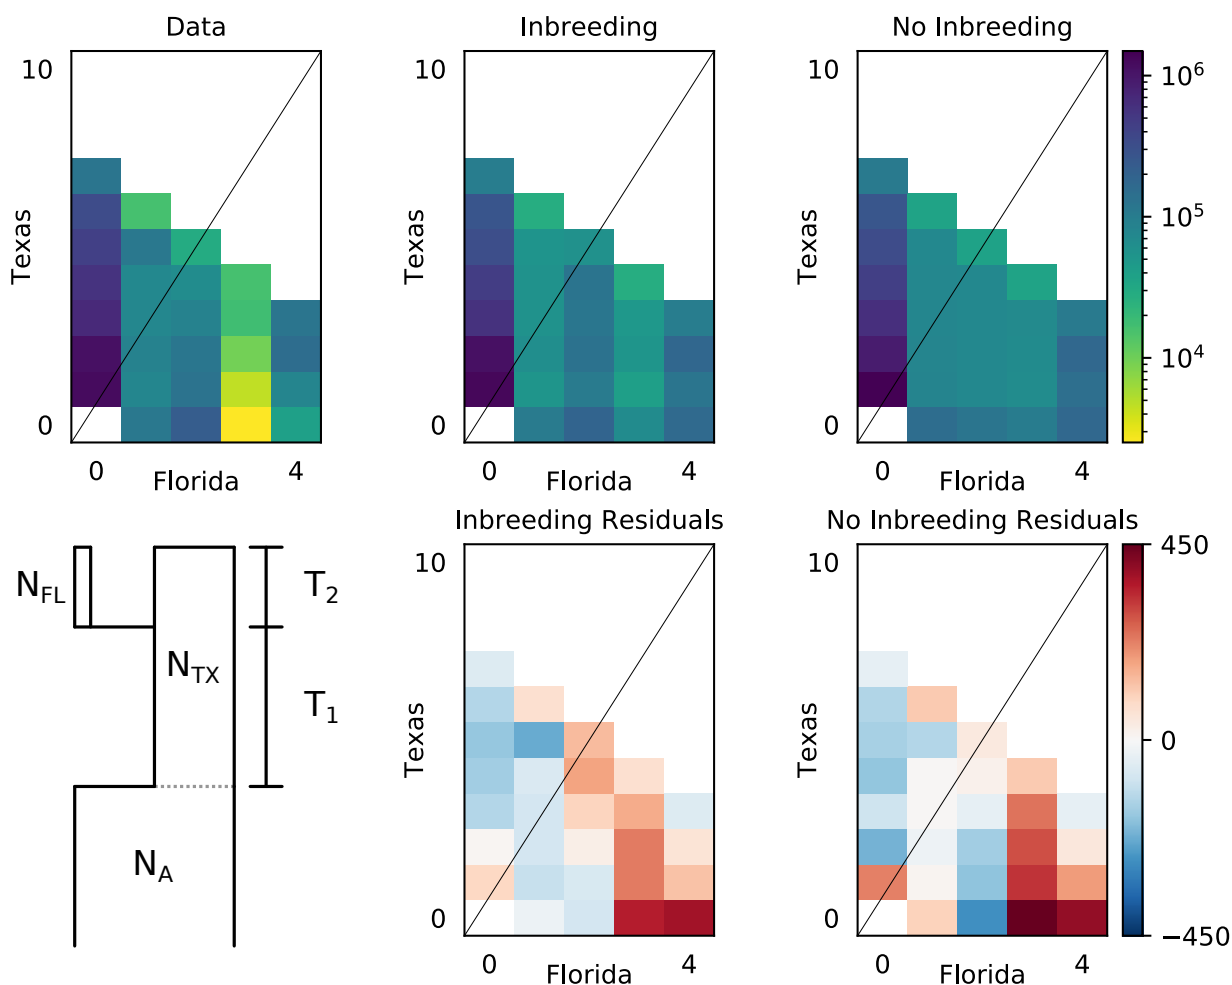

Figure 3: The observed joint site frequency spectrum for *Puma concolor* in Texas and Florida, along with the model fit and residuals, for models with inbreeding (middle) and without inbreeding (right). Residuals for each model are plotted below their expected spectra and a cartoon representation of the proposed demographic model is given in the bottom left.

313 ing newly implemented optimization routines in the *dad* library built on top of the *nlopt* Python  
 314 package (Johnson 2014). Parameter estimates and their 95% confidence intervals are listed in Table  
 315 2 ( $\epsilon = 10^{-2}$ ). Uncertainty estimates across different step sizes for numerical differentiation using  
 316 the Godambe Information Matrix (Coffman *et al.* 2015) are presented in Tables S3 and S4.

317 Much like the models inferred with and without inbreeding for American pumas, the es-  
 318 timates of demography for cabbage are markedly different between the two analyses. When in-  
 319 breeding was not modeled, we infer an ancestral population size for cabbage of 19,100 individuals,  
 320 which expanded to a size of 123,000 individuals  $\sim 6,000$  years ago. This expanded population then  
 321 experienced a very recent and severe bottleneck 38 years ago down to a size of 592 individuals.  
 322 The time estimate for the bottleneck consistently hit the lower bound of the parameter search  
 323 space, however, suggesting that this estimate is likely not very reliable. Parameter estimates for

Table 2: Parameter estimates for *B. oleracea* var. *capitata* from demographic models estimated both with and without inbreeding. 95% confidence intervals are given in parentheses and were estimated using a step size of  $\epsilon = 10^{-2}$  for numerical differentiation. Population sizes are given in number of individuals and times are given in years. Parameters estimated at the upper/lower bound of the given search space are marked with an asterisk (\*).

| Parameter | Estimate With Inbreeding  | Estimate Without Inbreeding |
|-----------|---------------------------|-----------------------------|
| $N_A$     | 17,500 (16,900–18,100)    | 19,100 (18,500–19,800)      |
| $N_1$     | 31,600 (28,900–34,700)    | 123,000 (80,400–190,000)    |
| $N_2$     | 215,000 (4,910–9,370,000) | 592 (547–641)               |
| $T_1$     | 16,600 (12,900–21,200)    | 5,870 (5,200–6,620)         |
| $T_2$     | 322 (94.2–1,097)          | 38.3 (32.5–45.1)*           |
| $F$       | 0.578 (0.557–0.599)       | –                           |

324 the inbreeding model inferred an ancestral population size of 17,500 individuals, which expanded  
 325 to a size of 31,600 individuals  $\sim$ 17,000 years ago. This population then experienced an even larger  
 326 expansion to a size of 215,000 individuals 322 years ago. The model with inbreeding inferred  $F$   
 327 to be 0.578, showing that inbreeding in these cabbage samples is fairly high. The log-likelihoods  
 328 for the model with and without inbreeding were  $-4281.145$  and  $-24330.403$ , respectively, and the  
 329 Godambe-adjusted likelihood ratio statistic was 127.562 (p-value =  $\sim$ 0.0; Coffman *et al.* 2015). Fig-  
 330 ure 4 also shows the observed and predicted SFS for each model plus their residuals. The residual  
 331 plots clearly show that the model with inbreeding is able to capture more of the ‘zig-zagging’ pat-  
 332 tern of the lower frequency variants than the model without inbreeding, demonstrating its overall  
 333 better fit. Uncertainty estimates were again typically more stable across step sizes for the model  
 334 with inbreeding.

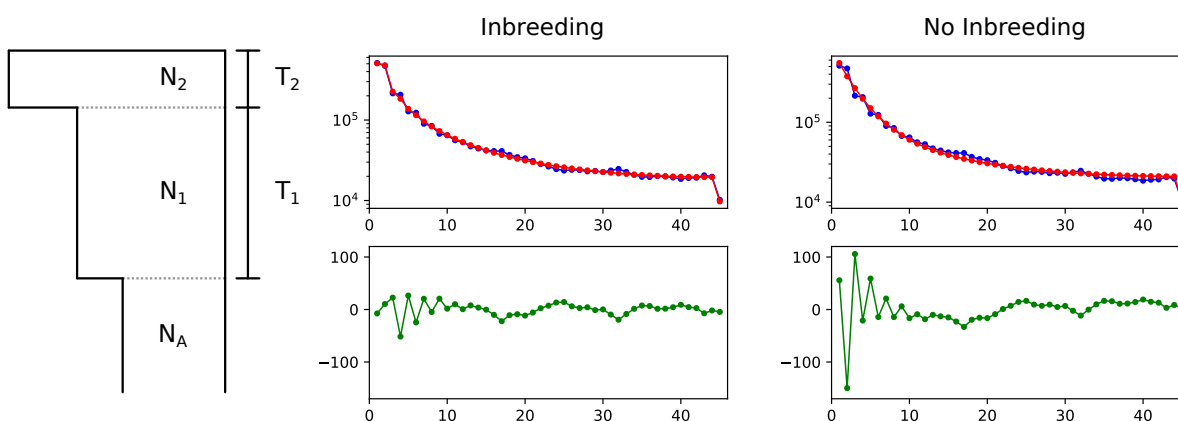

Figure 4: The observed site frequency spectrum for *Brassica oleracea* var. *capitata*, along with the model fit (red) and residuals (bottom panels), for models with inbreeding (middle) and without inbreeding (right). On the left is a cartoon of the proposed demographic model with parameters labeled.

## 335 Discussion

336 The prevalence of inbreeding in nature, especially among plant lineages and small and endan-  
337 gered populations, make it an important process to include in demographic models. Unlike  
338 previous approaches that rely on full genome sequences to characterize patterns of identity by  
339 descent or the distribution of runs of homozygosity, our model uses the frequency spectrum of  
340 biallelic SNPs to infer demography, allowing it to be employed not only in model systems but in  
341 organisms that lack a suitable reference genome as well. The impact of inbreeding on the SFS has  
342 important consequences for demographic inference, however, a result that is well-demonstrated  
343 by our simulations and example analyses. The relationship between inbreeding and population  
344 size is especially relevant for understanding inferences of past population dynamics. Below we  
345 describe this connection in the context of our simulations and the results of our empirical analyses,  
346 drawing on previous theoretical work to help qualify our results. We then discuss the importance  
347 of considering how our current model behaves for recent versus sustained inbreeding.

### 348 *The Effects of Inbreeding on Estimates of Demography*

#### 349 *Comparison with SLiM*

350 In our analysis of frequency spectra from SLiM, we found a high level of agreement between the  
351 expected SFS from the diffusion approximation and beta-binomial model in  $\partial a \partial i$  and the mean  
352 SFS from the three models we tested in SLiM. In addition, we were generally able to get accurate  
353 estimates for the parameters of the three models, though there was a large amount of variation.  
354 Part of this is likely driven by only simulating a 1 Mbp region, which limits the number of SNPs  
355 being used to build the SFS. A more important contributor to the variation in parameter estimates  
356 is the impact of inbreeding itself on the scaling of population level parameters such as  $\theta$ . Previous  
357 work in both the diffusion (Pollack 1987) and coalescent (Nordborg and Donnelly 1997; Nordborg  
358 2000) frameworks have derived the appropriate scaling of population-level parameters for inbred  
359 populations. In both cases, the equilibrium  $\theta$  of a randomly mating population simply needs to be  
360 rescaled by  $1 + F$  to obtain the corresponding process with inbreeding (here inbreeding is achieved  
361 through selfing). The same rescaling applies to parameters estimated by  $\partial a \partial i$  when inbreeding is  
362 included, so the appropriate scaling can be achieved by rescaling the affected parameters by  $1 + F$   
363 using the estimated value of the inbreeding coefficient.

#### 364 *Simulations with $\partial a \partial i$*

365 From our more detailed simulation experiments, we were able to characterize several scenarios  
366 where inbreeding adversely affects inferences of demography. For the single-population bottle-  
367 neck model in particular, not accounting for inbreeding had a dramatic impact on the accuracy of  
368 estimated population size. The primary reason for this is that inbreeding, much like population  
369 growth or contraction, affects the low frequency entries of the SFS in such a way that these factors  
370 are likely confounded (Figure 1).

371 The result of ignoring inbreeding for the two-population divergence with one-way migra-  
372 tion model was much less drastic (Figures S10), such that parameter estimates were often nearly  
373 as accurate as when we included inbreeding in the model. It should be noted that in this case  
374 the highest level of inbreeding was  $F = 0.5$ , compared to the highest level in the co-estimating in-  
375 breeding simulations ( $F = 0.9$ ). However, the fact that the results did not show the same pattern of

376 extremely poor parameter inference as the one-population model despite also having a bottleneck  
377 was noteworthy. One possible explanation for this is that jointly modeling the demography of the  
378 inbred, bottlenecked population with the main, non-inbred population provided more informa-  
379 tion in the 2D-SFS to estimate parameters. Nevertheless, despite having more overall accuracy  
380 than the one-population model, parameter estimates in the two-population model were increas-  
381 ingly underestimated with higher levels of inbreeding, demonstrating its adverse effects even  
382 when including a second panmictic species in the model.

383 The other two simulation experiments, masking rare variants and misspecifying inbreed-  
384 ing, provide further examples of the extent to which the variants with lowest frequency are con-  
385 founded with inbreeding in ways that affect demographic inference. Masking the singleton and  
386 doubleton entries of the 1D- and 2D-SFS for the bottleneck and divergence models, respectively,  
387 had only a small effect on estimates of population size and the timing of demographic events,  
388 showing that the signal for these inferences is also contained in the remaining entries of the SFS.  
389 However, estimates of gene flow were consistently underestimated in the divergence model, likely  
390 due to the fact that the influx of migrant alleles at low frequency were being masked. Simulations  
391 that modeled inbreeding when it was absent provide a different view on the inference of inbreed-  
392 ing and demography. In this case, the inbreeding coefficient was inferred to be  $\sim 0.1$  and  $\sim 0.2$  in  
393 the one- and two-population models, respectively, even though there was no inbreeding (Figure  
394 S13 and S14). The accuracy of the remaining parameters was fairly high; however, there were  
395 instances of certain parameter combinations leading to over- and underestimation of the true pa-  
396 rameter value. Therefore, to prevent poor estimation of other parameter values, it is advised that  
397 inbreeding be included in a model only when there is an observable excess in homozygosity.

#### 398 *Results from Empirical Analyses*

399 The impact of inbreeding on the results of our empirical analyses demonstrate the importance  
400 of directly estimating this parameter when inferring demography. Analyses with and without  
401 inbreeding provided different estimates of population size and duration for Texas pumas and in-  
402 fer strikingly different population size changes during the history of domesticated cabbage. In  
403 the case of the American puma, our estimates of population divergence time between Texas and  
404 Florida, the timing of movement from South America into North America, reductions in popula-  
405 tion size (especially for the Florida population), and a high level of inbreeding in Florida panthers  
406 are all consistent with previous work (Culver *et al.* 2000; Ochoa *et al.* 2017, 2019).

407 The demographic history inferred for cabbage provides yet another example of how inbreed-  
408 ing and population contraction can be confounded since estimates of current population size with-  
409 out inbreeding were  $\sim 600$  individuals, an unrealistic estimate given the prevalence of cabbage  
410 cultivation, as well as the clear discrepancy between model fit and the observed SFS for low fre-  
411 quency variants (Figure 4). Including inbreeding, however, provides a potentially revealing look  
412 into the domestication history of cabbage, especially regarding the signal for the textbook “domes-  
413 tication bottleneck” (Gaut *et al.* 2018). The expansion of the ancestral cabbage population  $\sim 17,000$   
414 years ago coincides with the end of glaciation in Europe and, in particular, the Mediterranean re-  
415 gion (Hughes *et al.* 2006; Clark *et al.* 2009; Hughes and Woodward 2017). Previous work has also  
416 placed the timing of domestication for the cabbage morphotype of *B. oleracea* at approximately 500  
417 years ago (Cheng *et al.* 2016b), which roughly agrees with the date that we estimated for the sec-  
418 ondary population expansion. This series of population expansions differs quite conspicuously  
419 when compared to what is often expected for domesticated species (e.g., severe bottlenecks; Doe-

420 bley *et al.* 2006; Meyer and Purugganan 2013; Gerbault *et al.* 2014; Gaut *et al.* 2018). Given the  
421 relatively high inbreeding coefficient estimated for cabbage ( $F = 0.58$ ), and the fact that ignoring  
422 inbreeding led to inferences of a very recent and severe bottleneck, it is possible that past infer-  
423 ences of domestication bottlenecks have been partially misled by the occurrence of inbreeding  
424 when inferring population dynamics.

### 425 *Short- Versus Long-Term Inbreeding*

426 In a review on the effects of inbreeding, Deborah Charlesworth (2003) discussed the temporal as-  
427 pects of its impact on genetic diversity, distinguishing between the short-term consequences on  
428 patterns of diversity (i.e., excess homozygosity compared to panmixia) versus the long-term ef-  
429 fects of inbreeding that lead to an overall reduction in the effective size of the population. The  
430 method we have introduced here is capable of modeling inbreeding in both categories by not  
431 only fitting the physical manifestation of inbreeding in the SFS (i.e., spikiness), but also by being  
432 able to appropriately scale the diffusion process to account for the reduction in diversity caused  
433 by inbreeding ( $\theta_F = \frac{\theta}{1+F}$ ). The reduction in effective population size, as well as the recombi-  
434 nation rate, that inbreeding causes has important consequences for the impact of selection and the  
435 rate of adaptation in inbred populations (Charlesworth 1992; Hartfield and Glémin 2016; Hart-  
436 field and Bataillon 2019). Therefore, studies aiming to identify the targets of selection in inbred,  
437 non-equilibrium populations must exercise special caution. This is especially relevant for domes-  
438 ticated species and organisms of conservation concern, whose evolutionary histories can often  
439 involve drastic changes in population size. Moving forward, the joint inference of demography,  
440 inbreeding, and selection will be an important advance for better understanding their collective  
441 contributions to genetic variation, as well as having potentially large consequences on informing  
442 decision making in agriculture and the designation of protection status for threatened or endan-  
443 gered species.

## 444 **Materials and Methods**

### 445 *Comparison with SLiM*

446 Simulations to validate the expected SFS with inbreeding were conducted using SLiM v3.3 (Haller  
447 and Messer 2019). To include inbreeding, we set the selfing rate in SLiM to  $s = 2F/(1 + F)$ ,  $F = 0.1$ ,  
448 0.25, 0.5, 0.75, and 0.9, and conducted 50 independent simulations, randomly sampling 25 indi-  
449 viduals with replacement 100 times for each replicate, for a total of 5000 simulated spectra for each  
450 of three models: (1) equilibrium/standard neutral model, (2) bottleneck and growth model, and  
451 (3) divergence with one-way migration model (models two and three are depicted in Figure 2).  
452 Each simulation used  $\theta = 4N_A L\mu = 10,000$ , with  $N_A = 1000$ ,  $L = 1 \times 10^6$  bp, and  $\mu = 2.5 \times 10^{-5}$ .  
453 We also set the recombination rate,  $r$ , equal to the mutation rate. For all models, we simulated  
454 10,000 generations of burn-in to allow the ancestral population to reach equilibrium and included  
455 selfing from the start of the simulation for models one and two. Individuals were sampled di-  
456 rectly after this phase for the standard neutral model. For model two, after burn-in, we reduced  
457 the population size to 250 individuals and then allowed the population size to recover exponen-  
458 tially back to 1000 individuals over 400 generations:  $N(t) = 250 \times \frac{1000}{250}^{\frac{t}{400}}$ . Model three started  
459 with an outcrossing equilibrium population, from which we split off a selfing population with a  
460 size of 250 individuals. These two populations were then simulated forward for an additional 400

461 generations with the selfing population receiving migrants from the original population at a rate  
462 of  $m_{21} = 5 \times 10^{-4}$ . At the end of each simulation, individual genotype information was exported  
463 in variant call format and summarized using a Python script to obtain the SFS (available on  
464 GitHub). The expected SFS was then calculated by taking the mean value of each entry of the sim-  
465 ulated spectra across replicates for each model and each value of the inbreeding coefficient. This  
466 simulation routine was also replicated to generate 20 independent data sets for each model across  
467 the five levels of inbreeding to infer parameters using *∂a∂i* v2.0.3 (Gutenkunst *et al.* 2009). Models  
468 were specified in Python v3.7 using the parameterizations described above and depicted in Fig-  
469 ure 2. Parameters were estimated for each simulated frequency spectrum using 100 optimization  
470 runs initiated from different random starting points. Parameter estimates with the highest log-  
471 likelihood were then recorded for comparison with the true simulated values using the root mean  
472 squared deviation (RMSD).

473 Because inbreeding rescales the effective population size by a factor of  $1 + F$  (Pollack 1987;  
474 Nordborg and Donnelly 1997), and *∂a∂i* estimates parameters relative to the ancestral population  
475 size, we rescaled parameters in *∂a∂i* in the following ways for the simulations above. For the  
476 standard neutral model, we included selfing from the start of the simulation, so for our compari-  
477 son between SLiM and *∂a∂i* we divided the original  $\theta$  of 10,000 by  $1 + F$ . For the bottleneck and  
478 growth models, the ancestral population was also inbred, so we rescaled  $\theta$  by again dividing by  
479  $1 + F$ . The recovery time for this model was always set to 400 generations in SLiM, which in *∂a∂i*'s  
480 units would be equal to  $0.2 \times 2N_A$ . Because the effective ancestral population size gets smaller  
481 as inbreeding increases, we had to account for this by multiplying by a factor of  $1 + F$ . However,  
482 when inferring parameters under this model, we have to rescale in the opposite direction by di-  
483 viding by  $1 + F$  to get the correct estimate for the number of generations relative to the ancestral  
484 population size. Finally, for the divergence with one-way migration model, the ancestral pop-  
485 ulation is not inbred, so the only rescaling that needs to be done is for the size of the diverged  
486 selfing population ( $0.25N_A$  in *∂a∂i* units). When comparing the expected SFS between *∂a∂i* and  
487 SLiM, we divide 0.25 by  $1 + F$  to get the correct size for the inbred population. When inferring  
488 parameters, we instead multiply by  $1 + F$  to recover the original  $0.25N_A$ . In practice, it should be  
489 possible to estimate models assuming an outcrossing ancestral population and including a change  
490 in population size to account for the effects of inbreeding.

## 491 *Simulations*

492 Simulations to explore a greater breadth of parameters were conducted in Python 3.7 using func-  
493 tions available in the *∂a∂i* library (v2.0.3). For each simulation experiment, we used the same  
494 basic setup for simulating frequency spectra under the two main models that were tested. The  
495 two models were (1) a single-population model experiencing a bottleneck of varying size [ $0.1N_A$ ,  
496  $0.25N_A$ ,  $0.5N_A$ ] followed by exponential growth over different time scales [ $0.2N_A$ ,  $0.4N_A$ ,  $0.6N_A$ ]  
497 back to the original size and (2) a two-population model where a small subpopulation diverges  
498 from the main population at different times in the past [ $0.2N_A$ ,  $0.4N_A$ ,  $0.6N_A$ ], going through a  
499 bottleneck of different sizes [ $0.1N_A$ ,  $0.25N_A$ ,  $0.5N_A$ ] and receiving migrants from the main pop-  
500 ulation at different rates [ $0.25/N_A$ ,  $0.5/N_A$ ,  $0.75/N_A$ ]. For the **Co-Estimating Inbreeding and**  
501 **Demography** simulations, we generated SFS under a standard neutral model with inbreeding as  
502 well. We also used a larger range of inbreeding coefficients for this experiment ( $F_{IS}=0.1, 0.25, 0.5,$   
503  $0.75,$  and  $0.9$ ). The remaining three simulations that were not focused on estimating inbreeding  
504 used a smaller range ( $F_{IS}=0.1, 0.2, 0.3, 0.4,$  and  $0.5$ ) since optimizations at higher inbreeding levels



505 generally failed to converge. Each simulation experiment was replicated 20 times, with each repli-  
506 cate having 25 individuals sampled per population and running 50 independent optimizations.  
507 Site frequency spectra were generated for each replicate by first getting the expected SFS for the  
508 model with the true parameters, followed by scaling the SFS using  $\theta = 10,000$  and sampling chro-  
509 mosomes assuming a Poisson distribution (`sample()` method in the `Spectrum` class within `∂adi`).  
510 Parameter estimates with the highest log-likelihood were selected from the 50 optimization runs  
511 for each replicate.

512 We evaluated parameter estimates for each experiment (including estimates with SLiM above)  
513 by comparing the estimated values with the true parameters by calculating the RMSD in R v3.6.1  
514 using the tidyverse package v1.2.1 (R Core Team 2019; Wickham *et al.* 2019). Plots from R were  
515 generated using ggplot2 v3.2.1 (Wickham 2009). Plots from Python were made using matplotlib  
516 v3.1.1 (Hunter 2007) or plotting functions within the `∂adi` library.

## 517 *Empirical Examples*

### 518 *American Puma*

519 Genome-wide variant data from Ochoa *et al.* (2019) were obtained from the authors for five Texas  
520 pumas and two Florida panthers in variant call format (VCF). SNPs within annotated genes were  
521 removed using bedtools v2.28.0 (Quinlan and Hall 2010), followed by processing with VCFtools  
522 v0.1.16 (Danecek *et al.* 2011) to retain only biallelic SNPs with no missing data. The final data  
523 set contained 6,262,417 sites, which we converted from VCF format into `∂adi`'s 'SNP data format'  
524 using a Python script (available on GitHub) for demographic analysis. We then estimated de-  
525 mographic parameters in `∂adi` using 100 independent optimization runs from different random  
526 starting points (Gutenkunst *et al.* 2009). Parameters were converted from estimated ratios of the  
527 ancestral population size ( $N_A$ ) to real units using a mutation rate of  $\mu = 2.2 \times 10^{-9}$ , a generation  
528 time of 3 years, and a sequence length of 2,564,692,624 bp Ochoa *et al.* (2019). Confidence intervals  
529 were estimated using the Godambe Information Matrix with 100 bootstrapped frequency spectra  
530 that were constructed by randomly sampling genome scaffolds with replacement until we reached  
531 the same number of scaffolds as the original full genome (Coffman *et al.* 2015). The Godambe In-  
532 formation Matrix uses numerical differentiation to estimate uncertainty and requires a step size  
533 ( $\epsilon$ ) to be chosen. The choice of step size should be roughly proportional to the size of the uncer-  
534 tainty that is being estimated. To evaluate which step size was most appropriate for American  
535 pumas, we used the bootstrapped spectra to estimate uncertainties across a range of step sizes:  
536  $[10^{-2} - 10^{-7}]$  by factors of 10. These bootstrapped frequency spectra were also used to conduct  
537 a likelihood ratio test between the models with and without inbreeding using the `LRT.adjust()`  
538 method in `∂adi` and comparing the test statistic to a weighted sum of  $\chi^2$  distributions with zero,  
539 one, and two degrees of freedom (Ota *et al.* 2000):  $\frac{1}{4}\chi_0^2 + \frac{1}{2}\chi_1^2 + \frac{1}{4}\chi_2^2$ . This weighted sum is used  
540 because we are testing whether the inbreeding coefficients for the Texas and Florida populations  
541 are equal to 0, which is the lower boundary of their parameter space since we are assuming in-  
542 breeding coefficients cannot be negative. Because of this, the typical normality assumptions used  
543 in the construction of the likelihood ratio test do not apply and we must adjust the distribution  
544 being used for assessing the significance of the likelihood ratio test statistic (Ota *et al.* 2000).

### 545 *Domesticated Cabbage*

546 We obtained a VCF file containing SNP calls for 45 cabbage individuals from resequencing data in

547 Cheng *et al.* (2016a,b). We then filtered out genic SNPs with bedtools v2.28.0 using gene anno-  
 548 tations from <http://www.genoscope.cns.fr/externe/plants/chromosomes.html> (Belser *et al.*  
 549 2018). Biallelic SNPs containing no missing data were extracted with VCFtools v0.1.16 for a fi-  
 550 nal data set with 2,941,018 variable sites. Demographic parameters were estimated in  $\partial a \partial i$  with  
 551 the BOBYQA algorithm implemented in the nlopt Python package using 100 independent opti-  
 552 mization runs from random starting points (Gutenkunst *et al.* 2009; Powell 2009; Johnson 2014).  
 553 Parameters were converted from estimated ratios of the ancestral population size to real units  
 554 using a mutation rate of  $\mu = 1.5 \times 10^{-8}$ , a generation time of 1 year, and a sequence length of  
 555 411,560,319 bp (chromosomes minus genic regions). Confidence intervals were then estimated  
 556 using the Godambe Information Matrix with 100 bootstrapped frequency spectra that were con-  
 557 structed by randomly sampling 1 Mbp blocks with replacement until the total sequence length  
 558 was as close as possible to the size of the full genome (528,860,695 bp; Coffman *et al.* 2015). We  
 559 also repeated the same procedure described above for choosing a step size for numerical differen-  
 560 tiation ( $\epsilon \in [10^{-2}, \dots, 10^{-7}]$  by factors of 10). These bootstrapped frequency spectra were again  
 561 used to conduct a likelihood ratio test between the models with and without inbreeding using  
 562 the `LRT_adjust()` method in  $\partial a \partial i$  and comparing the test statistic to a weighted sum of  $\chi^2$  dis-  
 563 tributions with zero and one degrees of freedom (see section above for rationale; Ota *et al.* 2000):  
 564  $\frac{1}{2}\chi_0^2 + \frac{1}{2}\chi_1^2$ .

#### 565 *Confidence Intervals for Composite Parameters*

566 We used the constants listed above for sequence length ( $L$ ), mutation rate ( $\mu$ ), and generation time  
 567 ( $g$ ) for pumas and domesticated cabbage to convert from the units used by  $\partial a \partial i$  to real units of  
 568 years and individuals. However, in order to estimate confidence intervals for these converted  
 569 parameters, we need to correctly account for the fact that times and population sizes are products  
 570 of two estimated parameters (either  $\theta \times T_{\partial a \partial i}$  or  $\theta \times N_{\partial a \partial i}$ ):  $T_{real} = \frac{2g}{4L\mu}\theta T_{\partial a \partial i}$  and  $N_{real} = \frac{1}{4L\mu}\theta N_{\partial a \partial i}$ .  
 571 We do this by propagating the uncertainty in our estimates of each individual parameter into a  
 572 combined estimate of the standard deviation for the composite parameter. In addition, because  
 573 our original uncertainty estimates for each parameter were large and led to negative values in our  
 574 confidence intervals, we instead estimated our uncertainty on a log scale. Taking the log of  $T_{real}$   
 575 and  $N_{real}$  gives us the following expressions for each parameter:

$$\log T_{real} = \log \left( \frac{2g}{4L\mu} \right) + \log \theta + \log T_{\partial a \partial i} ,$$

$$\log N_{real} = \log \left( \frac{1}{4L\mu} \right) + \log \theta + \log N_{\partial a \partial i} .$$

576 The corresponding expressions for the standard deviations of  $\log T_{real}$  and  $\log N_{real}$  are then

$$\sigma_{\log T_{real}} = \sqrt{\sigma_{\log \theta}^2 + \sigma_{\log T_{\partial a \partial i}}^2 + 2\sigma_{\log \theta, \log T_{\partial a \partial i}}} ,$$

$$\sigma_{\log N_{real}} = \sqrt{\sigma_{\log \theta}^2 + \sigma_{\log N_{\partial a \partial i}}^2 + 2\sigma_{\log \theta, \log N_{\partial a \partial i}}} ,$$

577 where  $\sigma_x^2$ ,  $\sigma_y^2$ , and  $\sigma_{x,y}$  are the variances and covariance for arbitrary variables  $x$  and  $y$ . With these  
578 new estimates of the standard deviation, we can obtain the log-scaled confidence intervals for  
579  $T_{real}$  and  $N_{real}$ :  $\log T_{real} \pm C\sigma_{\log T_{real}}$  and  $\log N_{real} \pm C\sigma_{\log N_{real}}$ . Here  $C$  is a constant chosen based on  
580 the desired confidence level (e.g.,  $C = 1.96$  for 95% confidence intervals). Exponentiating these  
581 expressions then gives us our confidence limits on the original scale.

## 582 Data Availability

583 The inbreeding model is implemented in the Python package *dadi*, which is available on Bit-  
584 bucket (<https://bitbucket.org/gutenkunstlab/dadi>). Code for generating and analyzing sim-  
585 ulated and empirical data sets from this paper are available on GitHub (<https://github.com/pblischak/inbreeding-sfs>). The *bbc-shiny/* folder in the GitHub repository also contains a  
586 small R Shiny application for plotting the probability mass function of the  $n$ -fold convolution of  
587 beta-binomials with different sample sizes, allele frequencies, and inbreeding coefficients.  
588

## 589 Acknowledgements

590 The authors thank A. Ochoa, S. Turner-Hissong, M. Culver, O. Conejo, and J. Robinson for gra-  
591 ciously agreeing to share empirical data for the present study. We would also like to thank mem-  
592 bers of the Barker and Gutenkunst labs for comments that helped to improve this manuscript.  
593 This work was supported by a National Science Foundation Postdoctoral Research Fellowship in  
594 Biology (IOS-1811784 to P.D.B.) and by the National Institute of General Medical Sciences of the  
595 National Institutes of Health (R01GM127348 to R.N.G.).

## 596 References

- 597 Adams, A. M. and Hudson, R. R. 2004. Maximum-likelihood estimation of demographic parameters using the frequency spectrum of unlinked single-nucleotide polymorphisms. *Genetics*, 168:  
598 1699–1712.
- 600 Balding, D. J. and Nichols, R. A. 1995. A method for quantifying differentiation between populations at multi-allelic loci and its implications for investigating identity and paternity. *Genetica*,  
601 96: 3–12.
- 603 Balding, D. J. and Nichols, R. A. 1997. Significant genetic correlations among Caucasians at forensic DNA loci. *Heredity*, 108: 583–589.
- 605 Beissinger, T. M., Wang, L., Crosby, K., Durvasula, A., Hufford, M. B., and Ross-Ibarra, J. 2016. Recent demography drives changes in linked selection across the maize genome. *Nature Plants*,  
606 2: 16084.
- 608 Belser, C., Istace, B., Denis, E., Dubarry, M., Baurens, F.-C., Falentin, C., Genete, M., Berrabah, W.,  
609 Chèvre, A.-M., Delourme, R., Deniot, G., Denoëud, F., Duffé, P., Engelen, S., Lemainque, A.,  
610 Manzanares-Dauleux, M., Martin, G., Morice, J., Noel, B., Vekemans, X., D’Hont, A., Rousseau-  
611 Gueutin, M., Barbe, V., Cruaud, C., Wincker, P., and Aury, J.-M. 2018. Chromosome-scale assemblies of plant genomes using nanopore long reads and optical maps. *Nature Plants*, 4: 879–887.
- 613 Browning, S. R., Browning, B. L., Daviglus, M. L., Daviglus, M. L., Durazo-Arvizu, R. A., Schneiderman, N., Kaplan, R. C., and Laurie, C. C. 2018. Ancestry-specific recent effective population size in the Americas. *PLoS Genetics*, 14: e1007385.
- 616 Caicedo, A. L., Williamson, S. H., Hernandez, R. D., Boyko, A., Fledel-Alon, A., York, T. L., Polato, N. R., Olsen, K. M., Nielsen, R., McCouch, S. R., Bustamante, C. D., and Purugganan, M. D. 2007. Genome-wide patterns of nucleotide polymorphism in domesticated rice. *PLoS Genetics*,  
617 3: e163.
- 620 Ceballos, F. C., Joshi, P. K., Clark, D. W., Ramsay, M., and Wilson, J. F. 2018. Runs of homozygosity: Windows into population history and trait architecture. *Nature Reviews Genetics*, 19: 220–234.
- 622 Charlesworth, B. 1992. Evolutionary rates in partially self-fertilizing species. *The American Naturalist*, 140: 126–148.
- 624 Charlesworth, D. 2003. Effects of inbreeding on the genetic diversity of populations. *Philosophical Transactions of the Royal Society B*, 358: 1051–1070.
- 626 Cheng, F., Wu, J., Cai, C., Fu, L., Liang, J., Borm, T., Zhuang, M., Zhang, Y., Zhang, F., Bonnema, G., and Wang, X. 2016a. Genome resequencing and comparative variome analysis in a *Brassica rapa* and *Brassica oleracea* collection. *Scientific Data*, 3: 160119.
- 629 Cheng, F., Sun, R., Hou, X., Zheng, H., Zhang, F., Zhang, Y., Liu, B., Liang, J., Zhuang, M., Liu, Y.,  
630 Liu, D., Wang, X., Li, P., Liu, Y., Lin, K., Bucher, J., Zhang, N., Wang, Y., Wang, H., Deng, J., Liao, Y.,  
631 Wei, K., Zhang, X., Fu, L., Hu, Y., Liu, J., Cai, C., Zhang, S., Zhang, S., Li, F., Zhang, H., Zhang, J.,  
632 Guo, N., Liu, Z., Liu, J., Sun, C., Ma, Y., Zhang, H., Cui, Y., Freeling, M. R., Borm, T., Bonnema,

- 633 G., Wu, J., and Wang, X. 2016b. Subgenome parallel selection is associated with morphotype  
634 diversification and convergent crop domestication in *Brassica rapa* and *Brassica oleracea*. *Nature*  
635 *Genetics*, 48: 1218–1224.
- 636 Clark, P. U., Dyke, A. S., Shakun, J. D., Carlson, A. E., Clark, J., Wohlfarth, B., Mitrovica, J. X.,  
637 Hostetler, S. W., and McCabe, A. M. 2009. The last glacial maximum. *Science*, 325: 710–714.
- 638 Coffman, A. J., Hsieh, P. H., Gravel, S., and Gutenkunst, R. N. 2015. Computationally efficient  
639 composite likelihood statistics for demographic inference. *Molecular Biology and Evolution*, 33:  
640 591–593.
- 641 Cornejo, O. E., Yee, M.-C., Dominguez, V., Andrews, M., Sockell, A., Strandberg, E., Livingstone,  
642 III, D., Stack, C., Romero, A., Umaharan, P., Royaert, S., Tawari, N. R., Ng, P., Gutierrez, O.,  
643 Phillips, W., Mockaitis, K., Bustamante, C. D., and Motamayor, J. C. 2018. Population genomic  
644 analyses of the chocolate tree, *Theobroma cacao* L., provide insights into its domestication process.  
645 *Communications Biology*, 1: 167.
- 646 Culver, M., Johnson, W. E., Pecon-Slattery, J., and O'Brien, S. J. 2000. Genomic ancestry of the  
647 American puma (*Puma concolor*). *The Journal of Heredity*, 91: 186–197.
- 648 Danecek, P., Auton, A., Abecasis, G., Albers, C. A., Banks, E., DePristo, M. A., Handsaker, R. E.,  
649 Lunter, G., Marth, G. T., Sherry, S. T., McVean, G., Durbin, R., and 1000 Genomes Project Analy-  
650 sis Group 2011. The variant call format and VCFtools. *Bioinformatics*, 27: 2156–2158.
- 651 Doebley, J. F., Gaut, B. S., and Smith, B. S. 2006. The molecular genetics of crop domestication. *Cell*,  
652 127: 1309–1321.
- 653 Excoffier, L., Dupanloup, I., Huerta-Sánchez, E., Sousa, V. C., and Foll, M. 2013. Robust demo-  
654 graphic inference from genomic and SNP data. *PLoS Genetics*, 9: e1003905.
- 655 Fortier, A. L., Coffman, A. J., Struck, T. J., Irby, M. N., Burguete, J. E. L., Ragsdale, A. P., and  
656 Gutenkunst, R. N. 2019. DFEinitely different: Genome-wide characterization of differences in  
657 mutation fitness effects between populations. *bioRxiv*, doi: 10.1101/703918.
- 658 Gaut, B. S., Seymour, D. K., Liu, Q., and Zhou, Y. 2018. Demography and its effects on genomic  
659 variation in crop domestication. *Nature Plants*, 4: 512.
- 660 Gerbault, P., Allaby, R. G., Boivin, N., Rudzinski, A., Grimaldi, I. M., Pires, J. C., Climer Vigueira,  
661 C., Dobney, K., Gremillion, K. J., Barton, L., Arroyo-Kalin, M., Purugganan, M. D., Rubio de  
662 Casas, R., Bollongino, R., Burger, J., Fuller, D. Q., Bradley, D. G., Balding, D. J., Richerson,  
663 P. J., Gilbert, M. T. P., Larson, G., and Thomas, M. G. 2014. Storytelling and story testing in  
664 domestication. *Proceedings of the National Academy of Sciences U.S.A.*, 111: 6159–6164.
- 665 Gutenkunst, R. N., Hernandez, R. D., Williamson, S. H., and Bustamante, C. D. 2009. Inferring the  
666 joint demographic history of multiple populations from multidimensional SNP frequency data.  
667 *PLoS Genetics*, 5: e1000695.
- 668 Haller, B. C. and Messer, P. W. 2019. SLiM 3: Forward genetic simulations beyond the Wright-  
669 Fisher model. *Molecular Biology and Evolution*, 36: 632–637.

- 670 Hansen, K. 1992. *Cougar, the American lion*. Flagstaff, AZ: Northland Publishing.
- 671 Hartfield, M. and Bataillon, T. 2019. Selective sweeps under dominance and inbreeding. *bioRxiv*,  
672 doi: <https://doi.org/10.1101/318410>.
- 673 Hartfield, M. and Glémin, S. 2016. Limits to adaptation in partially selfing species. *Genetics*, 203:  
674 959–974.
- 675 Hughes, P. D. and Woodward, J. C. 2017. Quaternary glaciation in the Mediterranean mountains:  
676 A new synthesis. *Geological Society, London, Special Publications*, 433: 1–23.
- 677 Hughes, P. D., Woodward, J. C., and Gibbard, P. L. 2006. Quaternary glacial history of the Mediter-  
678 ranean mountains. *Progress in Physical Geography: Earth and Environment*, 30: 334–364.
- 679 Hunter, J. D. 2007. Matplotlib: A 2d graphics environment. *Computing in Science & Engineering*, 9:  
680 90–95.
- 681 Johnson, S. G. 2014. *The NLOpt nonlinear-optimization package*, <http://github.com/stevengj/nlopt>.
- 682 Johnson, W. E., Onorato, D. P., Roelke, M. E., Land, E. D., Cunningham, M., Belden, R. C., McBride,  
683 R., Jansen, D., Lotz, M., Shindle, D., Howard, J., Wildt, D. E., Penfold, L. M., Hostetler, J. A., Oli,  
684 M. K., and O'Brien, S. J. 2010. Genetic restoration of the Florida panther. *Science*, 329: 1641–1645.
- 685 Jouganous, J., Long, W., Ragsdale, A. P., and Gravel, S. 2017. Inferring the joint demographic  
686 history of multiple populations: Beyond the diffusion approximation. *Genetics*, 206: 1549–1567.
- 687 Kardos, M., Qvarnström, A., and Ellegren, H. 2017. Inferring individual inbreeding and demo-  
688 graphic history from segments of identity by descent in *Ficedula* flycatcher genome sequences.  
689 *Genetics*, 205: 1319–1334.
- 690 Kim, B. Y., Huber, C. D., and Lohmueller, K. E. 2017. Inference of the distribution of selection  
691 coefficients for new nonsynonymous mutations using large samples. *Genetics*, 206: 345–361.
- 692 Kirin, M., McQuillan, R., Franklin, C. S., Campbell, H., McKeigue, P. M., and F.Wilson, J. 2010.  
693 Genomic runs of homozygosity record population history and consanguinity. *PLoS ONE*, 5:  
694 e13996.
- 695 Koenig, D., Hagmann, J., Li, R., Bemm, F., Slotte, T., Neuffer, B., Wright, S. I., and Weigel, D. 2019.  
696 Long-term balancing selection drives evolution of immunity genes in *Capsella*. *eLife*, 8: e43606.
- 697 Lukić, S. and Hey, J. 2012. Demographic inference using spectral methods on SNP data, with an  
698 analysis of the human out-of-Africa expansion. *Genetics*, 192(2): 619–639.
- 699 Maggioni, L. 2015. *Domestication of Brassica oleracea L.* Ph.D. thesis, Swedish University of Agri-  
700 cultural Sciences.
- 701 Meyer, R. S. and Purugganan, M. D. 2013. Evolution of crop species: Genetics of domestication  
702 and diversification. *Nature Reviews Genetics*, 14: 840–852.

- 703 Nielsen, R., Melissa J. Hubisz, I. H., Torgerson, D., Andrés, A. M., Albrechtsen, A., Gutenkunst,  
704 R., Adams, M. D., Cargill, M., Boyko, A., Indap, A., Bustamante, C. D., , and Clark, A. G. 2009.  
705 Darwinian and demographic forces affecting human protein coding genes. *Genome Research*, 19:  
706 838–849.
- 707 Nordborg, M. 2000. Linkage disequilibrium, gene trees and selfing: An ancestral recombination  
708 graph with partial self-fertilization. *Genetics*, 154: 923–929.
- 709 Nordborg, M. and Donnelly, P. 1997. The coalescent process with selfing. *Genetics*, 146: 1185–1195.
- 710 Ochoa, A., Onorato, D. P., Fitak, R. R., Roelke-Parker, M. E., and Culver, M. 2017. Evolutionary  
711 and Functional Mitogenomics Associated With the Genetic Restoration of the Florida Panther.  
712 *Journal of Heredity*, 108: 449–455.
- 713 Ochoa, A., Onorato, D. P., Fitak, R. R., Roelke-Parker, M. E., and Culver, M. 2019. *De novo* assembly  
714 and annotation from parental and F<sub>1</sub> puma genomes for the Florida panther genetic restoration  
715 program. *G3: Genes|Genomes|Genetics*, 9: 3531–3536.
- 716 Ota, R., Waddell, P. J., Hasegawa, M., Shimodaira, H., and Kishino, H. 2000. Appropriate Likeli-  
717 hood Ratio Tests and Marginal Distributions for Evolutionary Tree Models with Constraints on  
718 Parameters. *Molecular Biology and Evolution*, 17: 798–803.
- 719 Pollack, E. 1987. On the theory of partially inbreeding finite populations. I. partial selfing. *Genetics*,  
720 117: 353–360.
- 721 Powell, M. J. D. 2009. The BOBYQA algorithm for bound constrained optimization without  
722 derivatives. Technical Report 2009/NA06, Department of Applied Mathematics and Theoretical  
723 Physics, Cambridge University.
- 724 Quinlan, A. R. and Hall, I. M. 2010. BEDTools: A flexible suite of utilities for comparing genomic  
725 features. *Bioinformatics*, 26: 841–842.
- 726 R Core Team 2019. *R: A language and environment for statistical computing*. R Foundation for Statis-  
727 tical Computing, Vienna, Austria.
- 728 Robinson, J. A., Vecchyo, D. O.-D., Fan, Z., Kim, B. Y., von Holdt, B. M., Marsden, C. D.,  
729 Lohmueller, K. E., and Wayne, R. K. 2016. Genomic flatlining in the endangered island fox.  
730 *Current Biology*, 26: 1183–1189.
- 731 Robinson, J. A., Räikkönen, J., Vucetich, L. M., Vucetich, J. A., Peterson, R. O., Lohmueller, K. E.,  
732 and Wayne, R. K. 2019. Genomic signatures of extensive inbreeding in isle royale wolves, a  
733 population on the threshold of extinction. *Science Advances*, 5: eaau0757.
- 734 Robinson, J. D., Coffman, A. J., Hickerson, M. J., and Gutenkunst, R. N. 2014. Sampling strategies  
735 for frequency spectrum-based population genomic inference. *BMC Evolutionary Biology*, 4: 254.
- 736 Sawyer, S. A. and Hartl, D. L. 1992. Population genetics of polymorphism and divergence. *Genet-  
737 ics*, 132: 1161–1176.

- 738 Seal, U. S. and Lacy, R. C. 1994. A plan for genetic restoration and management of the Florida  
739 panther (*Felis concolor coryi*): report to the Florida Game and Freshwater Fish Commission. Con-  
740 servation Breeding Specialist Group, Apple Valley, MN.
- 741 Shafer, A. B., Wolf, J. B., Alves, P. C., Bergström, L., Bruford, M. W., Brännström, I., Colling, G.,  
742 Dalén, L., Meester, L. D., Ekblom, R., Fawcett, K. D., Fior, S., Hajibabaei, M., Hill, J. A., Hoebel,  
743 A. R., Höglund, J., Jensen, E. L., Krause, J., Kristensen, T. N., Krützen, M., McKay, J. K., Nor-  
744 man, A. J., Ogden, R., Österling, E. M., Ouborg, N. J., Piccolo, J., Popović, D., Primmer, C. R.,  
745 Reed, F. A., Roumet, M., Salmons, J., Schenekar, T., Schwartz, M. K., Segelbacher, G., Senn, H.,  
746 Thaulow, J., Valtonen, M., Veale, A., Vergeer, P., Vijay, N., Vilà, C., Weissensteiner, M., Wenner-  
747 ström, L., Wheat, C. W., and Zieliński, P. 2015. Genomics and the challenging translation into  
748 conservation practice. *Trends in Ecology & Evolution*, 30: 78–87.
- 749 Tataru, P., Mollion, M., Glémin, S., and Bataillon, T. 2017. Inference of distribution of fitness effects  
750 and proportion of adaptive substitutions from polymorphism data. *Genetics*, 207: 1103–1119.
- 751 Wickham, H. 2009. *ggplot2: Elegant graphics for data analysis*. Springer, New York.
- 752 Wickham, H., Averick, M., Bryan, J., Chang, W., McGowan, L. D., François, R., Grolemund, G.,  
753 Hayes, A., Henry, L., Hester, J., Kuhn, M., Pedersen, T. L., Miller, E., Bache, S. M., Müller, K.,  
754 Ooms, J., Robinson, D., Seidel, D. P., Spinu, V., Takahashi, K., Vaughan, D., Wilke, C., Woo, K.,  
755 and Yutani, H. 2019. Welcome to the tidyverse. *Journal of Open Source Software*, 4: 1686.
- 756 Williamson, S. H., Hernandez, R., Fledel-Alon, A., Zhu, L., Nielsen, R., and Bustamante, C. D.  
757 2005. Simultaneous inference of selection and population growth from patterns of variation in  
758 the human genome. *Proceedings of the National Academy of Sciences U.S.A.*, 102: 7882–7887.
- 759 Wright, S. 1951. The genetical structure of populations. *Annals of Eugenics*, 15: 323–354.
- 760 Xue, Y., Prado-Martinez, J., Sudmant, P. H., Narasimhan, V., Ayub, Q., Szpak, M., Frandsen, P.,  
761 Chen, Y., Yngvadottir, B., Cooper, D. N., de Manuel, M., Hernandez-Rodriguez, J., Lobon, I.,  
762 Siegismund, H. R., Pagani, L., Quail, M. A., Hvilson, C., Mudakikwa, A., Eichler, E. E., Cran-  
763 field, M. R., Marques-Bonet, T., Tyler-Smith, C., and Scally, A. 2015. Mountain gorilla genomes  
764 reveal the impact of long-term population decline and inbreeding. *Science*, 348: 242–245.



## 765 Supplemental Tables

Table S1: Log-scale standard deviations for parameters in the model with inbreeding for American pumas across a series of step sizes.

| $\epsilon$ | $\sigma_{\log v_{TX}}$ | $\sigma_{\log v_{FL}}$ | $\sigma_{\log \tau_1}$ | $\sigma_{\log \tau_2}$ | $\sigma_{\log F_{TX}}$ | $\sigma_{\log F_{FL}}$ | $\sigma_{\log \theta}$ |
|------------|------------------------|------------------------|------------------------|------------------------|------------------------|------------------------|------------------------|
| $10^{-2}$  | 0.0604                 | 1.281                  | 0.1961                 | 1.274                  | 0.0385                 | 0.0162                 | 0.0061                 |
| $10^{-3}$  | 0.0175                 | 0.1738                 | 0.0749                 | 0.1993                 | 0.0171                 | 0.0427                 | 0.0114                 |
| $10^{-4}$  | 0.0104                 | 0.3512                 | 0.0209                 | 0.3757                 | 0.0277                 | 0.0425                 | 0.0109                 |
| $10^{-5}$  | 0.0307                 | 0.3501                 | 0.0258                 | 0.3741                 | 0.0248                 | 0.0425                 | 0.0177                 |
| $10^{-6}$  | 0.0595                 | 0.3819                 | 0.1853                 | 0.4111                 | 0.0330                 | 0.0446                 | 0.0671                 |
| $10^{-7}$  | 0.0039                 | 0.0086                 | 0.0114                 | 0.0052                 | 0.0184                 | 0.0222                 | 0.0097                 |

Table S2: Log-scale standard deviations for parameters in the model without inbreeding for American pumas across a series of step sizes.

| $\epsilon$ | $\sigma_{\log v_{TX}}$ | $\sigma_{\log v_{FL}}$ | $\sigma_{\log \tau_1}$ | $\sigma_{\log \tau_2}$ | $\sigma_{\log \theta}$ |
|------------|------------------------|------------------------|------------------------|------------------------|------------------------|
| $10^{-2}$  | 0.8452                 | 1.057                  | 1.894                  | 1.067                  | 0.1353                 |
| $10^{-3}$  | 0.0642                 | 0.0312                 | 0.1588                 | 0.0370                 | 0.0160                 |
| $10^{-4}$  | 0.1603                 | 0.1758                 | 0.3030                 | 0.1818                 | 0.0170                 |
| $10^{-5}$  | 0.0205                 | 0.0109                 | 0.0410                 | 0.0114                 | 0.0105                 |
| $10^{-6}$  | 0.0025                 | 0.0079                 | 0.0126                 | 0.0029                 | 0.0103                 |
| $10^{-7}$  | 5.50e-5                | 6.69e-5                | 5.87e-5                | 1.03e-4                | 9.76e-3                |

Table S3: Log-scale standard deviations for parameters in the model with inbreeding for domesticated cabbage across a series of step sizes.

| $\epsilon$ | $\sigma_{\log v_1}$ | $\sigma_{\log v_2}$ | $\sigma_{\log \tau_1}$ | $\sigma_{\log \tau_2}$ | $\sigma_{\log F}$ | $\sigma_{\log \theta}$ |
|------------|---------------------|---------------------|------------------------|------------------------|-------------------|------------------------|
| $10^{-2}$  | 0.0432              | 1.913               | 0.1347                 | 0.6388                 | 0.0184            | 0.0171                 |
| $10^{-3}$  | 0.0426              | 1.953               | 0.4052                 | 0.8423                 | 0.0187            | 0.0655                 |
| $10^{-4}$  | 0.0434              | 1.411               | 0.2900                 | 0.5930                 | 0.0189            | 0.0470                 |
| $10^{-5}$  | 0.0426              | 0.7802              | 0.2784                 | 0.4184                 | 0.0189            | 0.0453                 |
| $10^{-6}$  | 0.0582              | 1.828               | 0.5530                 | 0.1422                 | 0.0183            | 0.0920                 |
| $10^{-7}$  | 0.1664              | 0.0979              | 0.1425                 | 0.4607                 | 0.0147            | 0.0953                 |

Table S4: Log-scale uncertainties for parameters in the model without inbreeding for domesticated cabbage across a series of step sizes.

| $\epsilon$ | $\sigma_{\log v_1}$ | $\sigma_{\log v_2}$ | $\sigma_{\log \tau_1}$ | $\sigma_{\log \tau_2}$ | $\sigma_{\log \theta}$ |
|------------|---------------------|---------------------|------------------------|------------------------|------------------------|
| $10^{-2}$  | 0.2236              | 0.0344              | 0.0597                 | 0.0856                 | 0.0161                 |
| $10^{-3}$  | 2.068               | 4.006               | 0.5373                 | 3.679                  | 0.0512                 |
| $10^{-4}$  | 2.596               | 1.325               | 0.5685                 | 1.560                  | 0.0438                 |
| $10^{-5}$  | 3.435               | 10.57               | 0.7405                 | 11.32                  | 0.0496                 |
| $10^{-6}$  | 0.9482              | 0.1776              | 0.2459                 | 0.0701                 | 0.0238                 |
| $10^{-7}$  | 0.0071              | 0.0077              | 0.0191                 | 0.0211                 | 0.0179                 |

766 **Supplemental Figures**

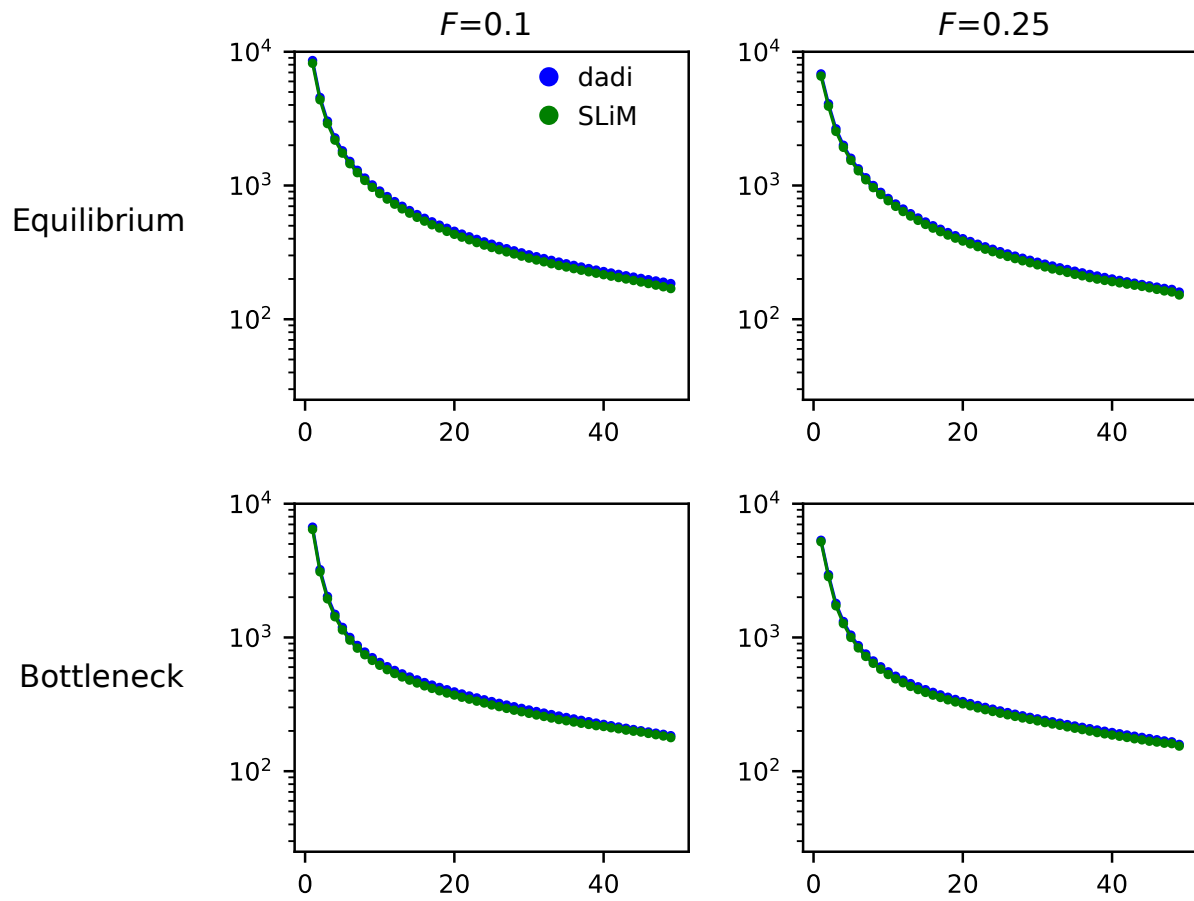

Figure S1: Comparison of expected frequency spectra for  $F=0.1$  and  $0.25$  for  $\partial\text{adi}$  (blue) and SLiM (green) for the equilibrium and bottleneck+growth models.

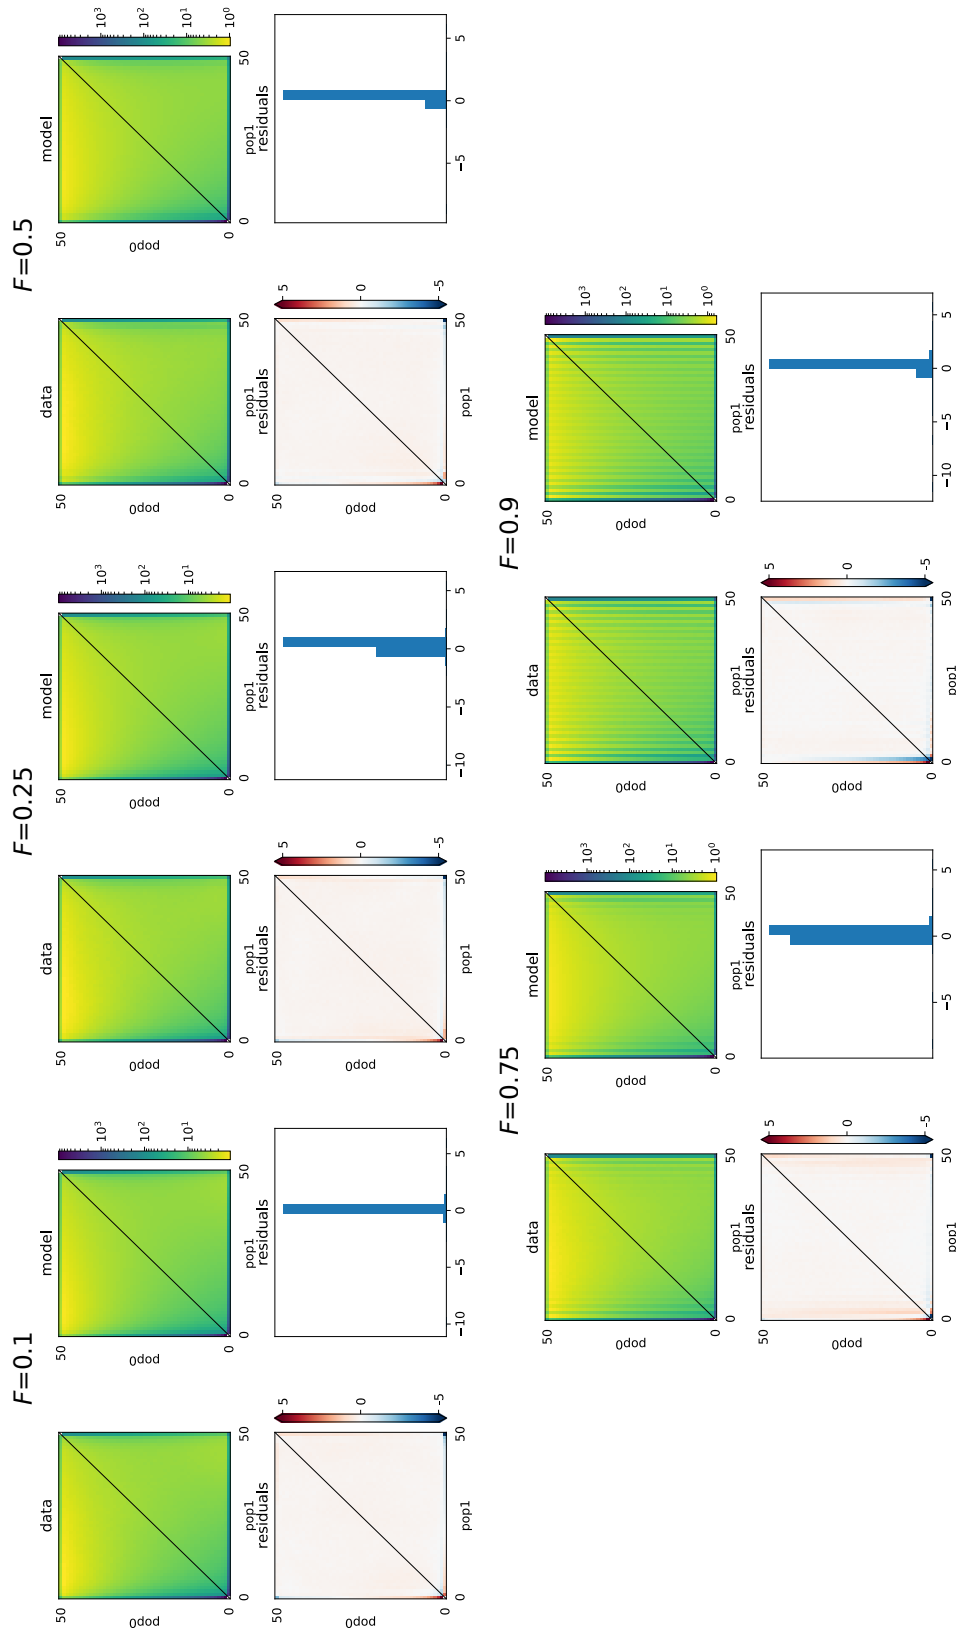

Figure S2: Comparison of expected frequency spectra for  $F = 0.1, 0.25, 0.5, 0.75,$  and  $0.9$  for  $\partial adit$  ('model') and SLiM ('data') for the domestication (divergence+one-way migration) model. Each plot also includes a heat map and histogram of the residual differences for the comparison between spectra from each method.

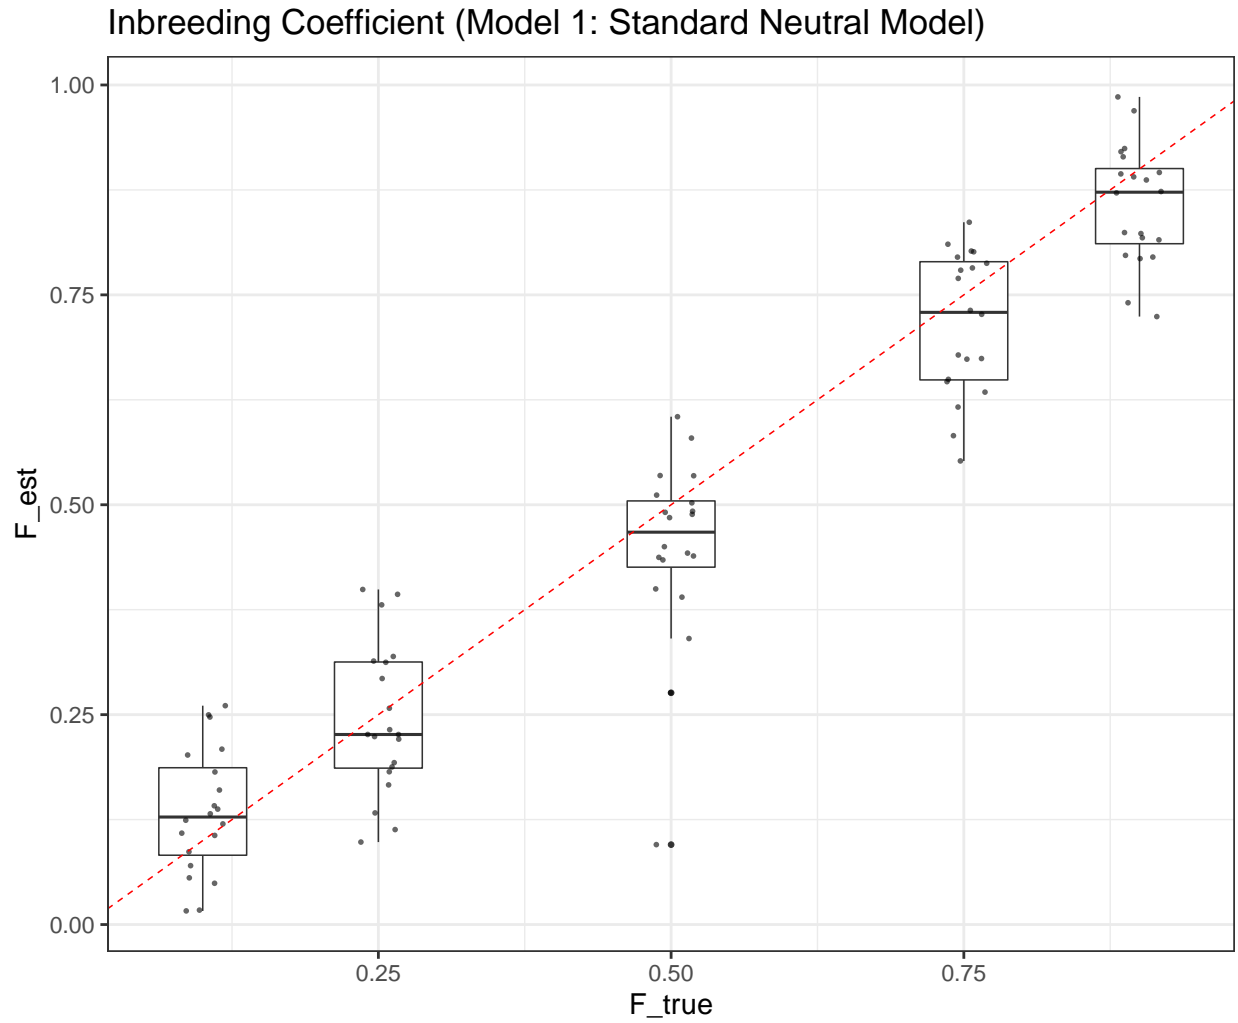

Figure S3: Estimates of the inbreeding coefficient for the equilibrium model generated by SLiM.

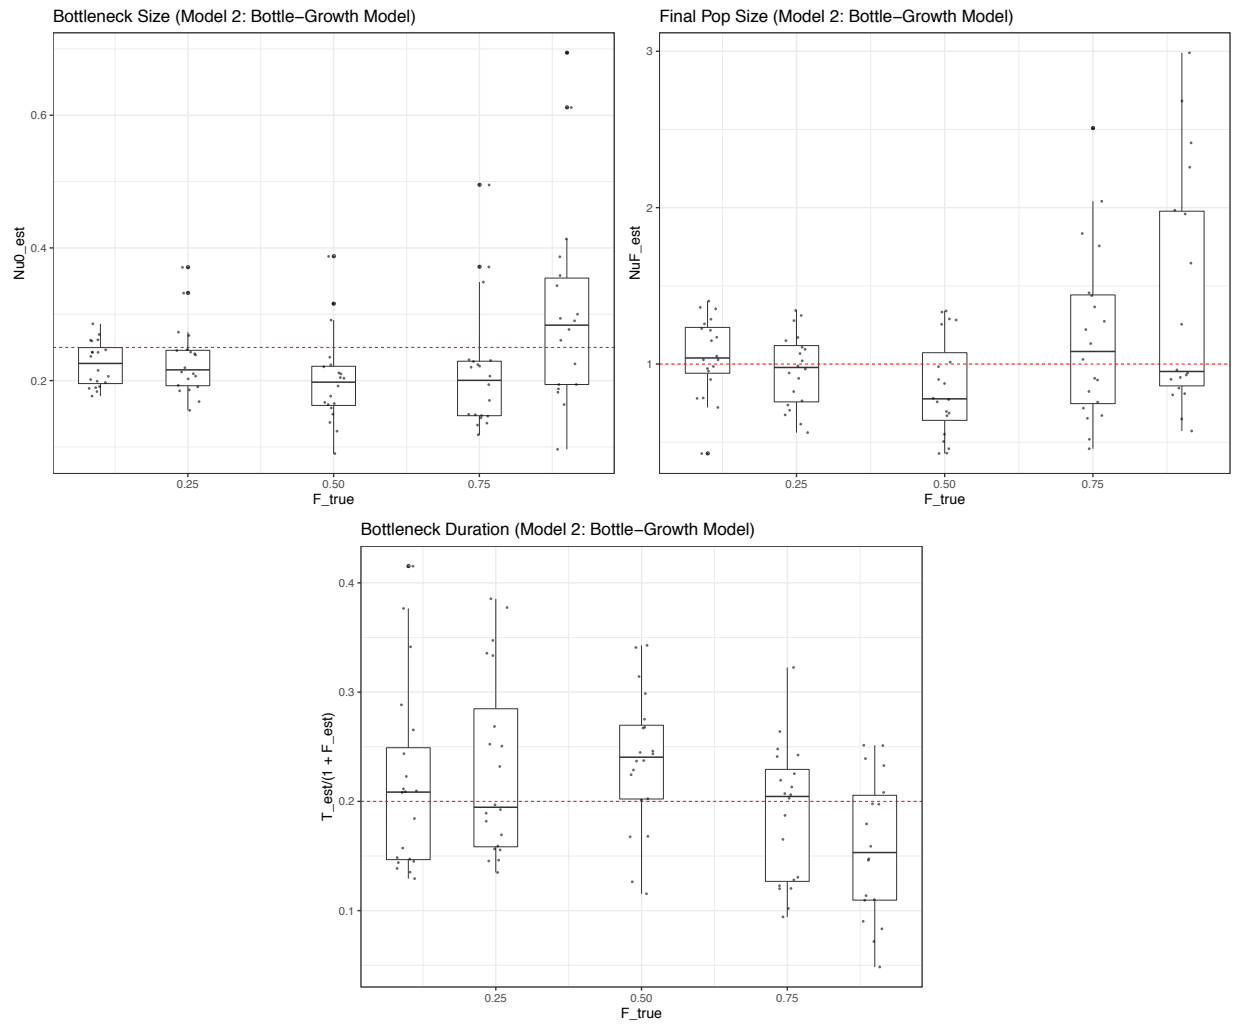

Figure S4: Parameter estimates from  $\partial a \partial i$  for data simulated by SLiM for the bottleneck+growth model [bottleneck size ( $\nu_0$ ): top left; final size ( $\nu_F$ ): top right; scaled bottleneck duration ( $\frac{\tau}{1+F}$ ): bottom].

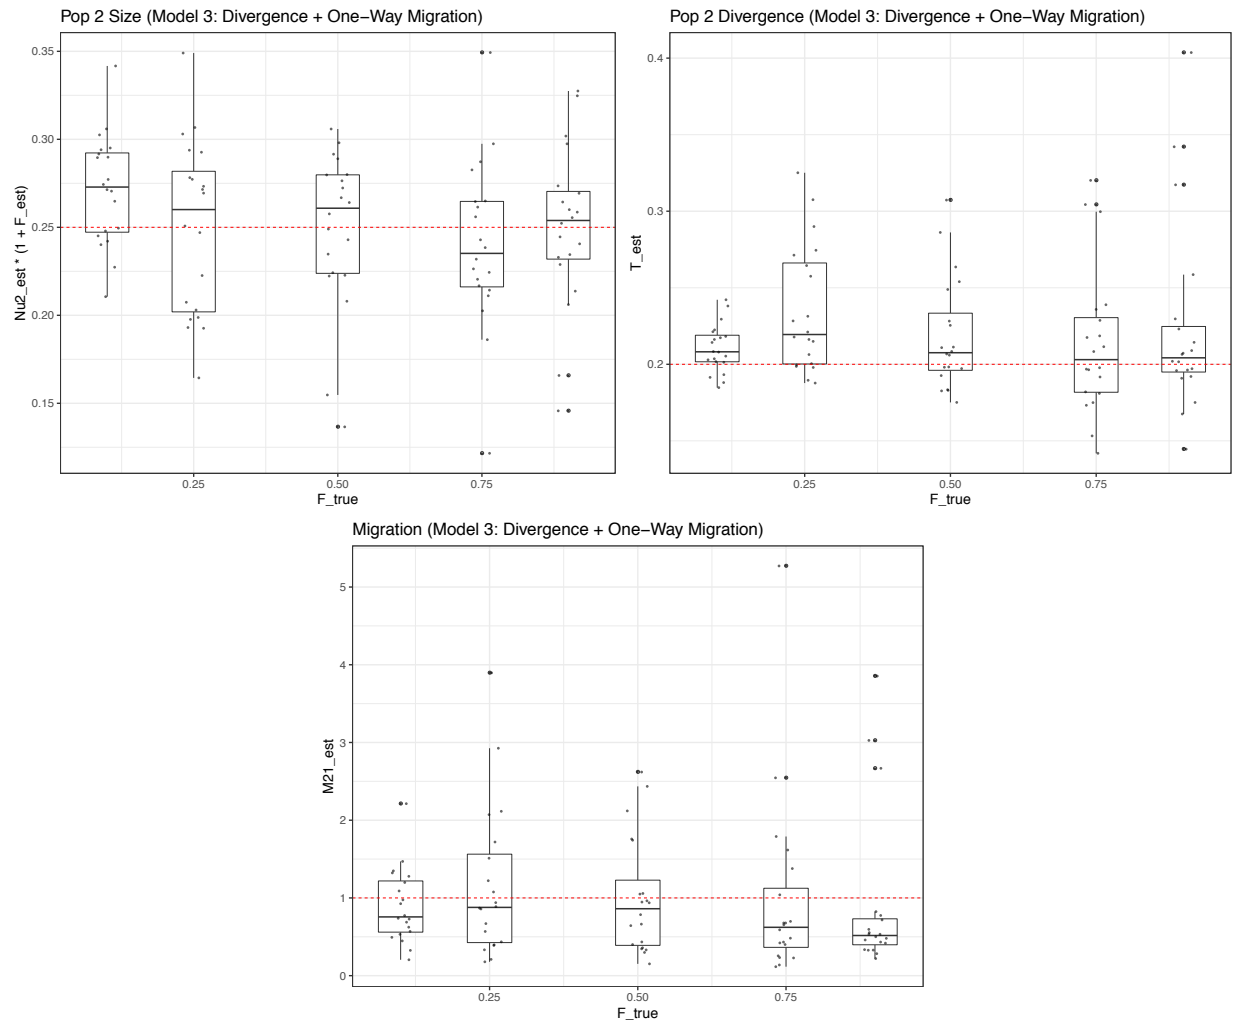

Figure S5: Parameter estimates from  $\partial a \partial i$  for data simulated by SLiM for the domestication (divergence+one-way migration) model [scaled size of population two ( $v_2 \times (1 + F)$ ): top left; divergence time ( $\tau$ ): top right; migration ( $M_{21}$ ): bottom].

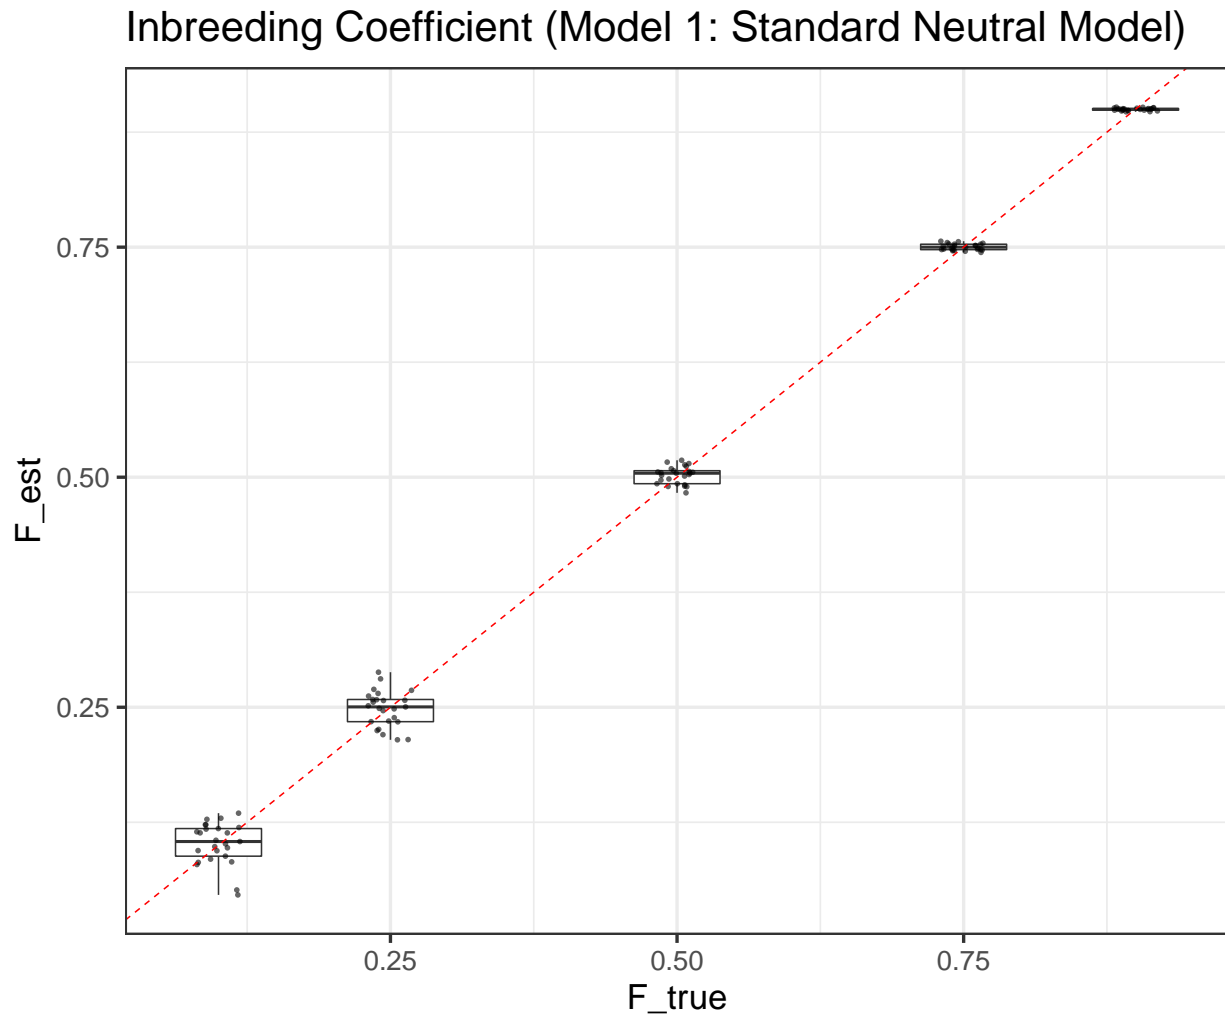

Figure S6: Estimates of the inbreeding coefficient for the standard neutral model for data generated by Poisson sampling within  $\partial a \partial i$ .



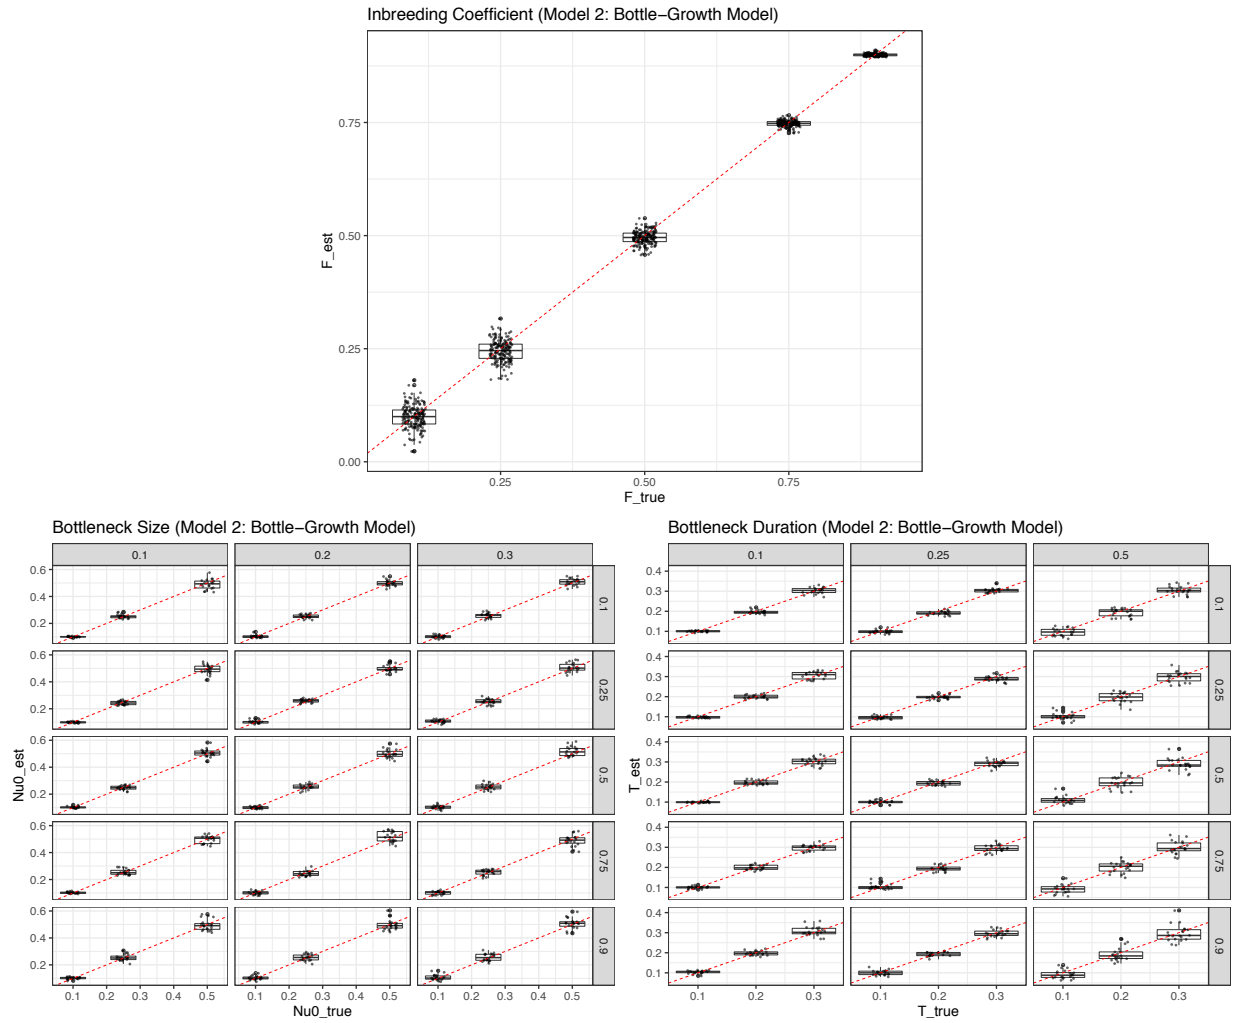

Figure S7: Parameter estimates from  $\partial a \partial i$  for data generated by Poisson sampling for the bottleneck+growth model [inbreeding coefficient ( $F=0.1, 0.25, 0.5, 0.75, 0.9$ ): top; bottleneck size ( $\nu_0=0.1, 0.25, 0.5$ ): bottom left; bottleneck duration ( $\tau=0.1, 0.2, 0.3$ ): bottom right]. Plots for  $\nu_0$  and  $\tau$  are split into rows (true inbreeding coefficient) and column (true simulated parameter value).

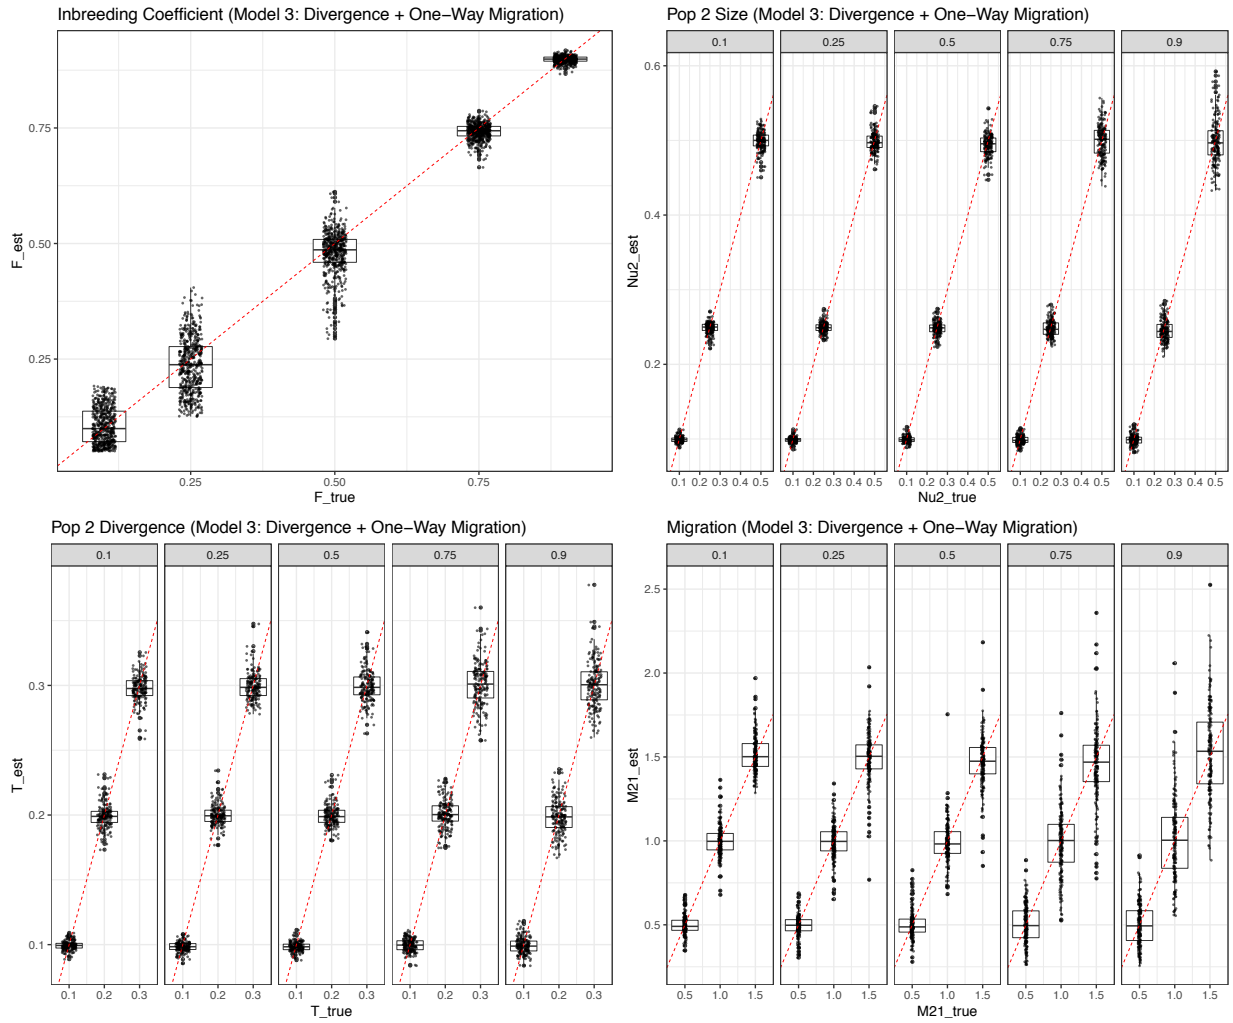

Figure S8: Parameter estimates from  $\partial a \partial i$  for data generated by Poisson sampling for the divergence+one-way migration model [inbreeding coefficient ( $F=0.1, 0.25, 0.5, 0.75, 0.9$ ): top left; size of population two ( $\nu_2=0.1, 0.25, 0.5$ ): top right; divergence time ( $\tau=0.1, 0.2, 0.3$ ): bottom left; migration ( $M_{21} = 0.5, 1.0, 1.5$ ): bottom right]. Plots for  $\nu_2$ ,  $\tau$ , and  $M_{21}$  are split into columns for each value of the inbreeding coefficient.

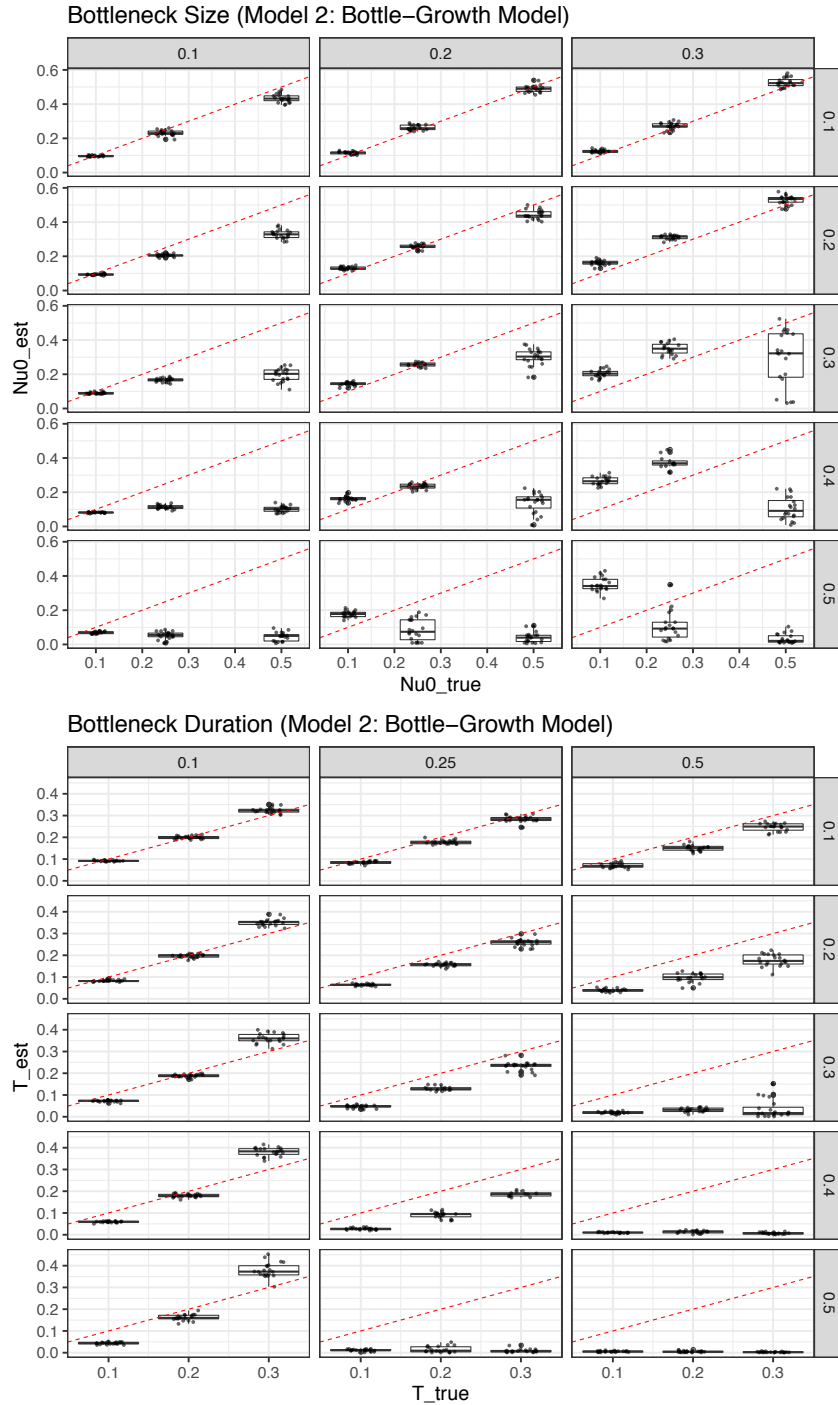

Figure S9: Parameter estimates from  $\partial\text{adi}$  for data generated by Poisson sampling for the bottleneck+growth model when inbreeding is ignored [inbreeding coefficient ( $F=0.1, 0.2, 0.3, 0.4, 0.5$ ): not estimated; bottleneck size ( $\nu_0=0.1, 0.25, 0.5$ ): top; bottleneck duration ( $\tau=0.1, 0.2, 0.3$ ): bottom]. Plots for  $\nu_0$  and  $\tau$  are split into rows (true inbreeding coefficient) and column (true simulated parameter value).

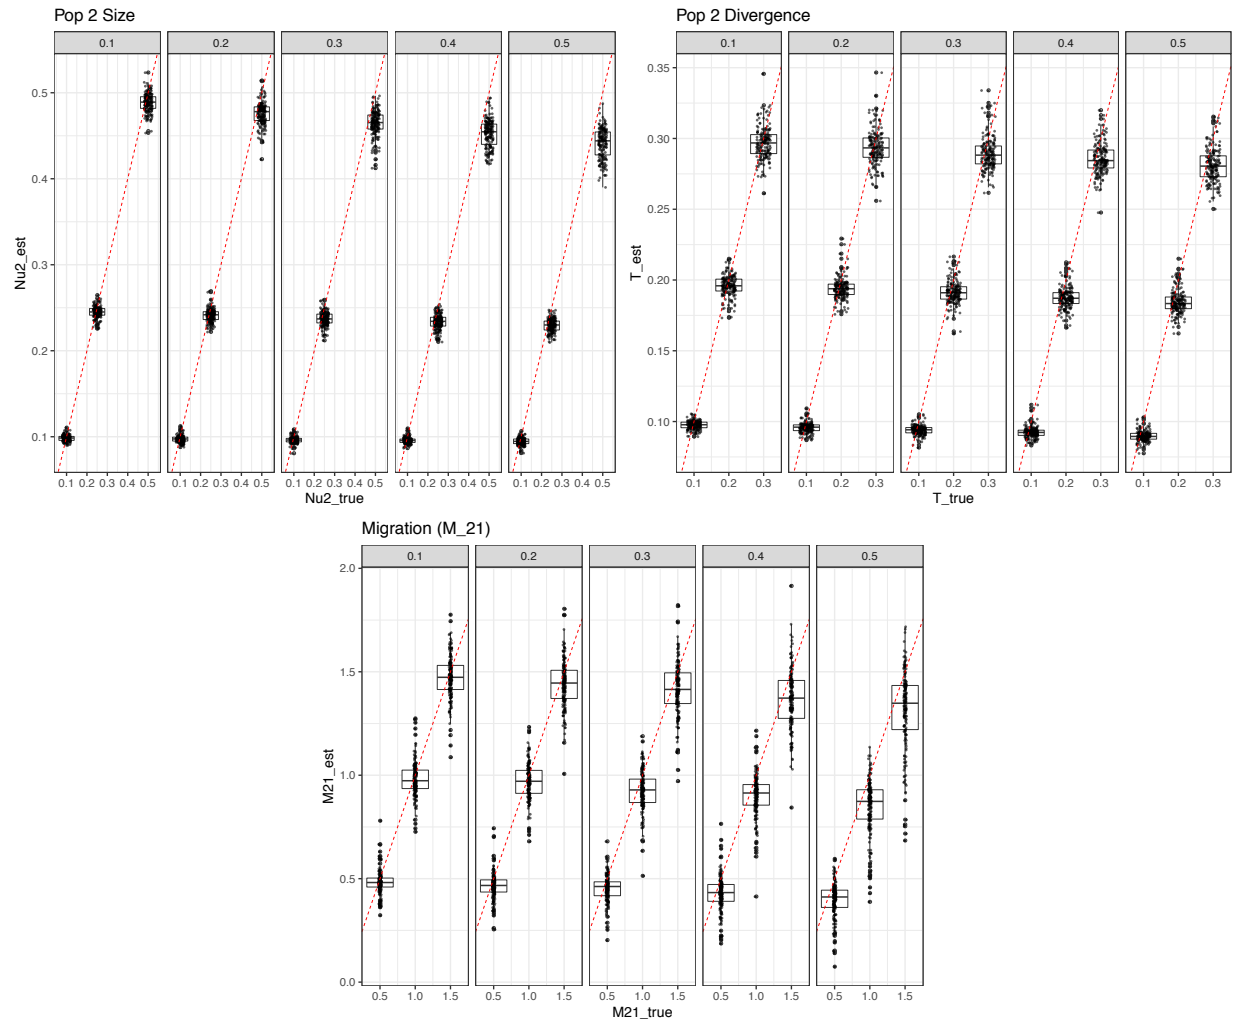

Figure S10: Parameter estimates from *daDi* for data generated by Poisson sampling for the divergence+one-way migration model *when inbreeding is ignored* [inbreeding coefficient ( $F=0.1, 0.2, 0.3, 0.4, 0.5$ ): *not estimated*; size of population two ( $\nu_2=0.1, 0.25, 0.5$ ): top left; divergence time ( $\tau=0.1, 0.2, 0.3$ ): top right; migration ( $M_{21} = 0.5, 1.0, 1.5$ ): bottom]. Plots for  $\nu_2$ ,  $\tau$ , and  $M_{21}$  are split into columns for each value of the inbreeding coefficient.

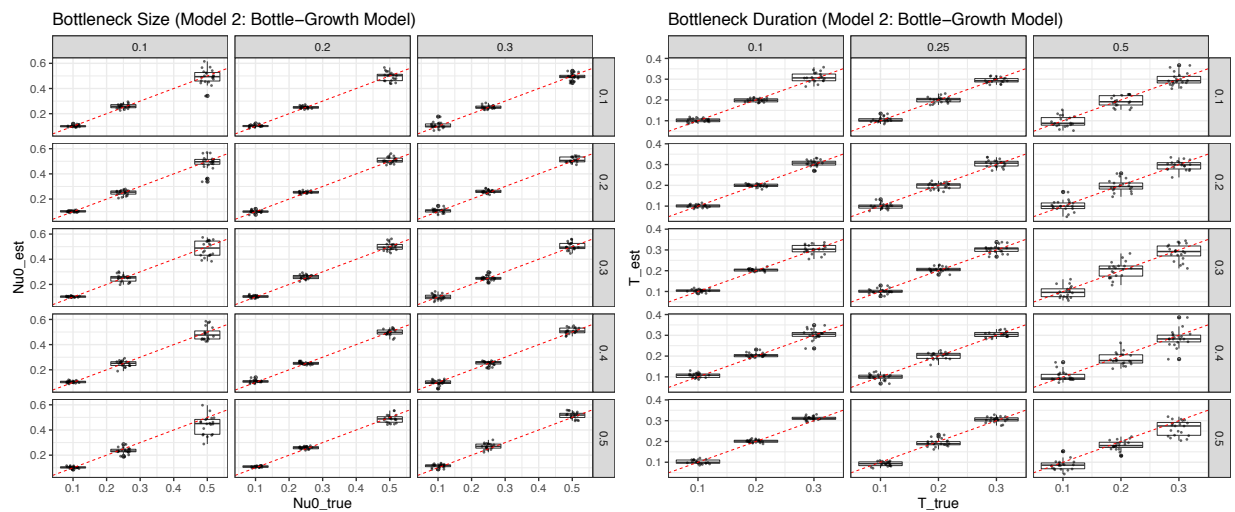

Figure S11: Parameter estimates from  $\partial a d i$  for data generated by Poisson sampling for the bottleneck+growth model *when rare variants are masked* [inbreeding coefficient ( $F=0.1, 0.2, 0.3, 0.4, 0.5$ ): *not estimated*; bottleneck size ( $\nu_0=0.1, 0.25, 0.5$ ): left; bottleneck duration ( $\tau=0.1, 0.2, 0.3$ ): right]. Plots for  $\nu_0$  and  $\tau$  are split into rows (true inbreeding coefficient) and column (true simulated parameter value).

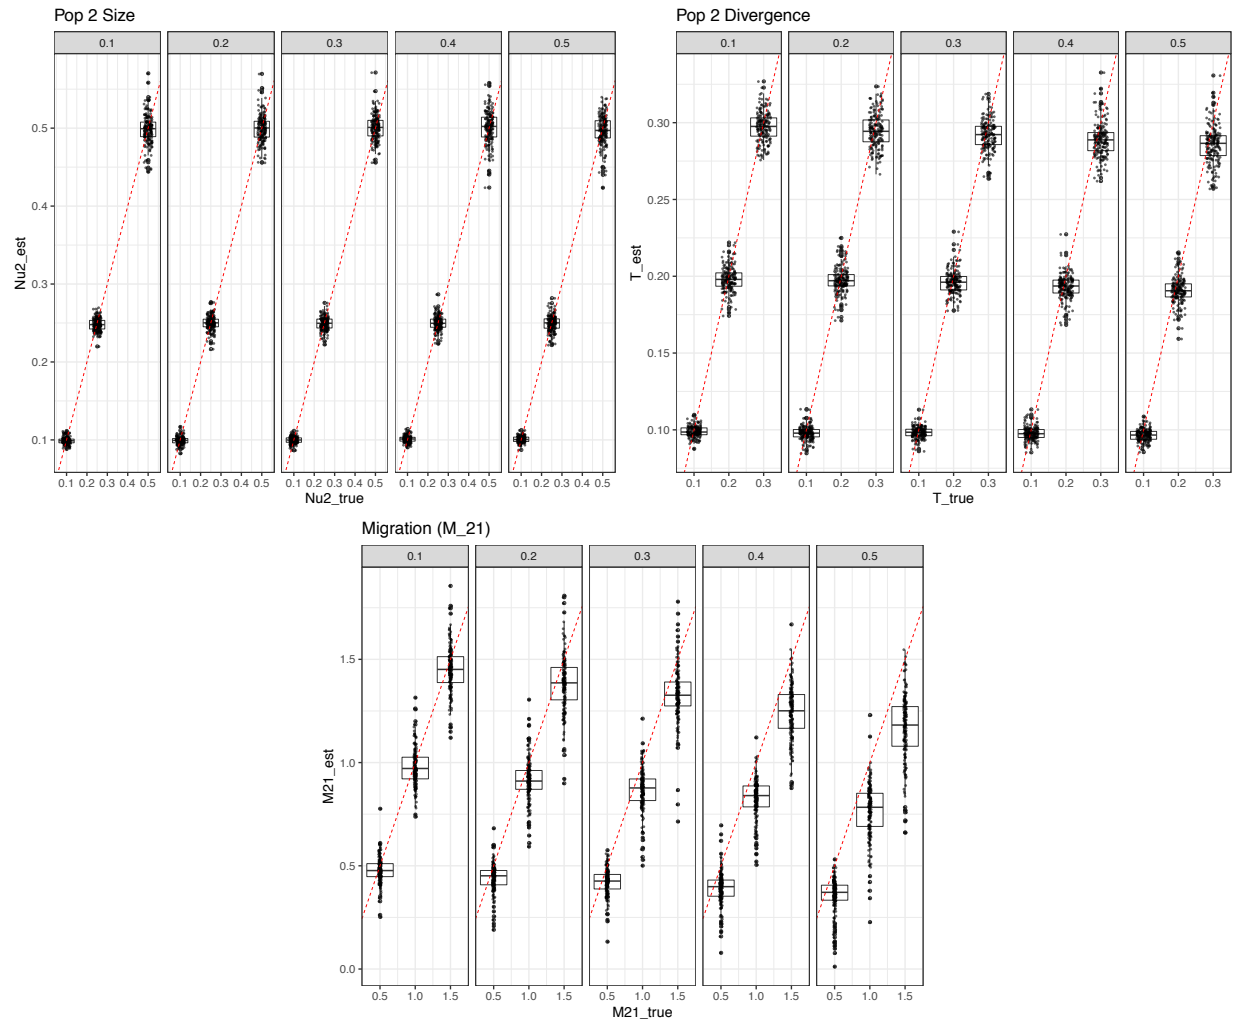

Figure S12: Parameter estimates from  $daDi$  for data generated by Poisson sampling for the divergence+one-way migration model when rare variants are masked [inbreeding coefficient ( $F=0.1, 0.2, 0.3, 0.4, 0.5$ ): not estimated; size of population two ( $\nu_2=0.1, 0.25, 0.5$ ): top left; divergence time ( $\tau=0.1, 0.2, 0.3$ ): top right; migration ( $M_{21} = 0.5, 1.0, 1.5$ ): bottom]. Plots for  $\nu_2$ ,  $\tau$ , and  $M_{21}$  are split into columns for each value of the inbreeding coefficient.

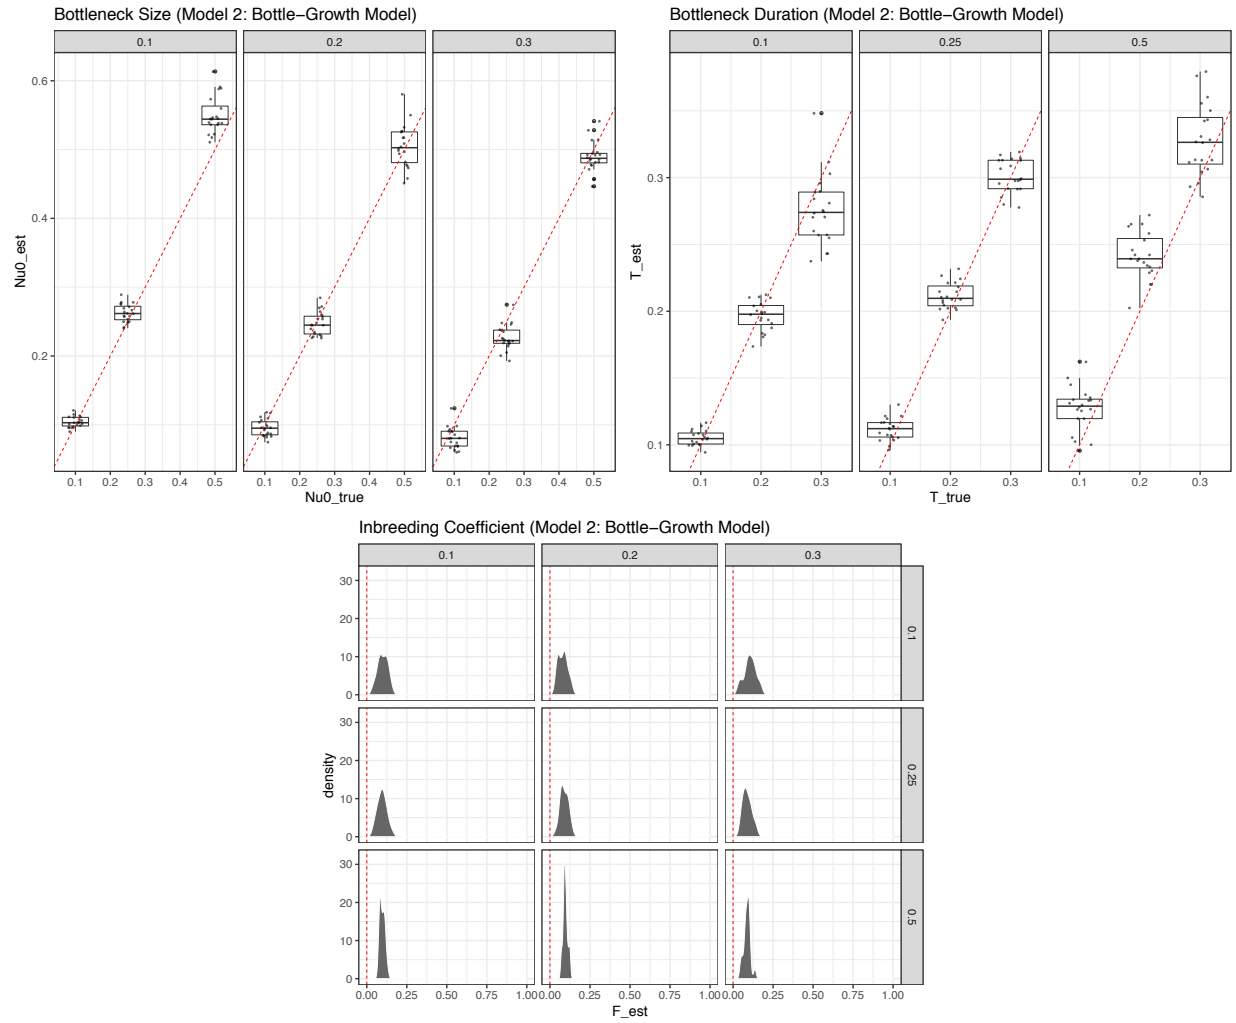

Figure S13: Parameter estimates from  $daDi$  for data generated by Poisson sampling for the bottleneck-growth model when inbreeding is absent but is still inferred [bottleneck size ( $\nu_0=0.1, 0.25, 0.5$ ): top left; bottleneck duration ( $\tau=0.1, 0.2, 0.3$ ): top right; inbreeding coefficient ( $F=0$ ): bottom]. Plots for  $\nu_0$  and  $\tau$  are split into columns for each value of the other simulated parameter value.

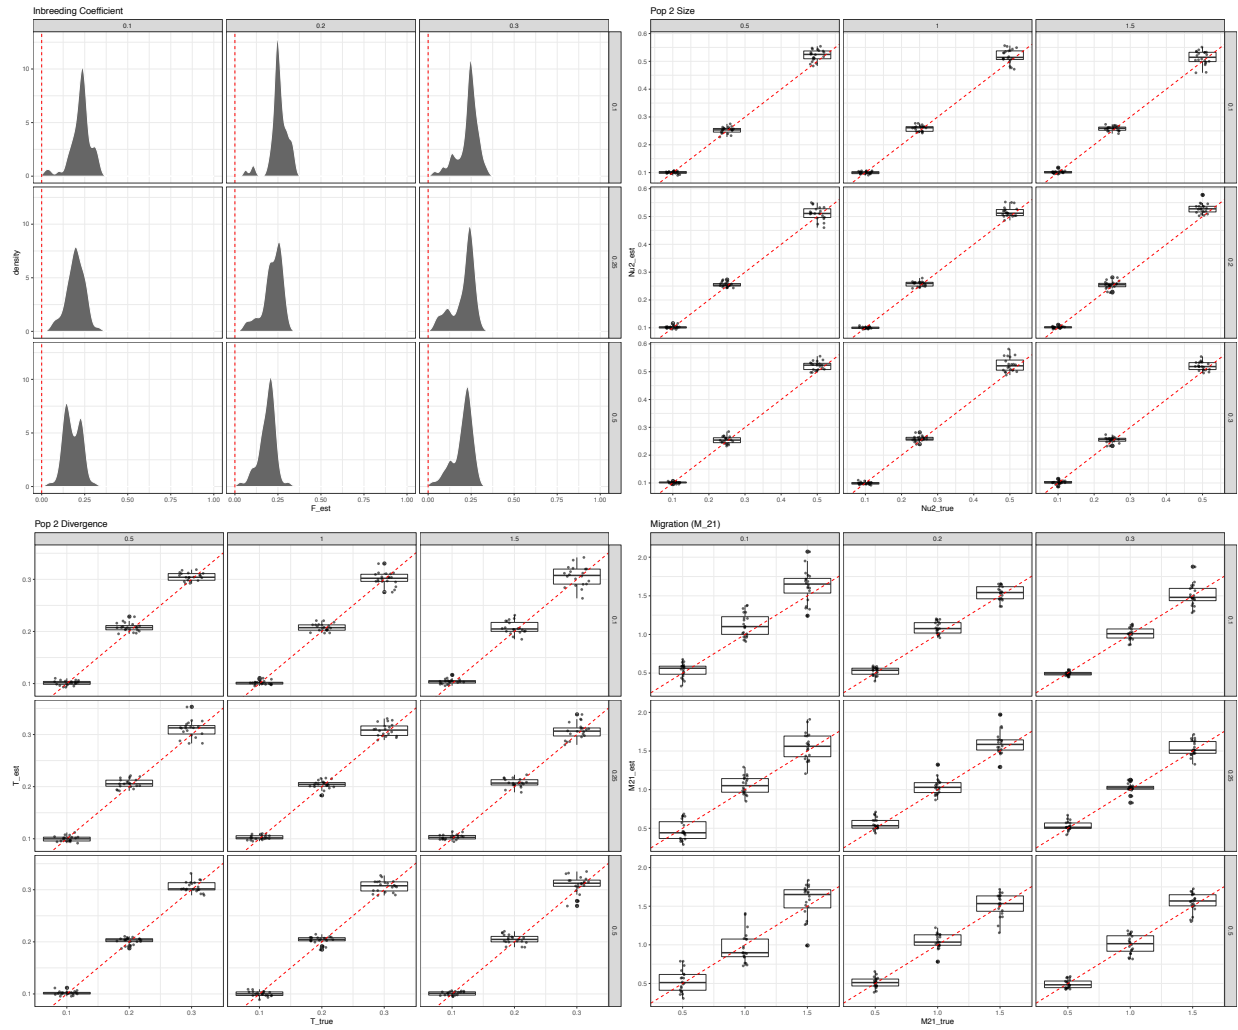

Figure S14: Parameter estimates from  $daDi$  for data generated by Poisson sampling for the divergence+one-way migration model *when inbreeding is absent but is still inferred* [inbreeding coefficient ( $F=0$ ): top left; size of population two ( $\nu_2=0.1, 0.25, 0.5$ ): top right; divergence time ( $\tau=0.1, 0.2, 0.3$ ): bottom left; migration ( $M_{21} = 0.5, 1.0, 1.5$ ): bottom]. Plots for  $\nu_2$ ,  $\tau$ , and  $M_{21}$  are split into rows and columns for each value of the other two simulated parameters.
